# Supplementary material for: Palladium-catalyzed carbonylative addition of aryl bromides to arylalkynes: a simple and efficient method for chalcone synthesis
Source: Royal Society of Chemistry journal article supplement (doi:10.1039/c4ob01263a), 2014-07-15

## Supporting Information

### **Palladium-Catalyzed Carbonylative Addition of Aryl Bromides to Arylalkynes: A Simple and Efficient Method for Chalcone Synthesis**

Sheng Zhang, Lianguang Wang, Xiujuan Feng and Ming Bao

*State Key Laboratory of Fine Chemicals, Dalian University of Technology, Dalian 116023, China*

### **Table of Contents**

|   |                                                                                                                  |     |
|---|------------------------------------------------------------------------------------------------------------------|-----|
| 1 | General Information                                                                                              | S2  |
| 2 | Preparation and Characterization of Deuterium-labeled Phenyl Acetylene <b>2b-d<sub>1</sub></b>                   | S2  |
| 3 | Representative Procedure for Palladium-Catalyzed Carbonylative Addition Reaction of Aryl Bromides to Arylalkynes | S2  |
| 4 | References                                                                                                       | S11 |
| 5 | Copies of <sup>1</sup> H and <sup>13</sup> C NMR Spectra of Starting Materials and Products                      | S12 |

---

## 1. General Information

Solvents were dried and degassed before use by standard procedures.  $^1\text{H}$  and  $^{13}\text{C}$  NMR spectra were recorded on either a Varian Inova-400 spectrometer (400 MHz for  $^1\text{H}$ , 100 MHz for  $^{13}\text{C}$ ) or a Bruker Avance II-400 spectrometer (400 MHz for  $^1\text{H}$ , 100 MHz for  $^{13}\text{C}$ );  $\text{CDCl}_3$  and TMS were used as a solvent and an internal standard, respectively. The chemical shifts are reported in ppm downfield ( $\delta$ ) from TMS, the coupling constants  $J$  are given in Hz. The peak patterns are indicated as follows: s, singlet; d, doublet; t, triplet; q, quartet; m, multiplet. IR spectra were recorded on a NEXUS FT-IR spectrometer. High resolution mass spectra were recorded on either a Q-TOF mass spectrometry or a GC-TOF mass spectrometry. TLC was carried out on  $\text{SiO}_2$  (silica gel 60 F<sub>254</sub>, Merck), and the spots were located with UV light, iodoplatinate reagent or 1% aqueous  $\text{KMnO}_4$ . Flash chromatography was carried out on  $\text{SiO}_2$  (silica gel 60, 200-300 mesh). The starting materials **1a–1k** and **2a–2l** are commercially available.

## 2. Preparation and Characterization of Deuterium-labeled Phenyl Acetylene **2b-d<sub>1</sub>**<sup>[1]</sup>

A 50 mL round bottomed flask was charged with phenyl acetylene (1.02 g, 10 mmol), potassium carbonate (2.07 g, 15 mmol), and MeCN (20 mL). After the resulting mixture was stirred under a nitrogen atmosphere for 30 min,  $\text{D}_2\text{O}$  (1.0 mL, 50 mmol) was added, and the resulting mixture was stirred for 1 h. The deuterium-labeled product was extracted with  $\text{CH}_2\text{Cl}_2$  (10 mL $\times$ 3), and the combined organic layers were washed with brine (10 mL  $\times$  2), dried over  $\text{MgSO}_4$ . The solvent was removed under reduced pressure to afford deuterium-labeled phenyl acetylene (**2b-d<sub>1</sub>**) as a colorless oil (887.0 mg, 86% yield).

### Deuterium-labeled Phenyl Acetylene (**2b-d<sub>1</sub>**)

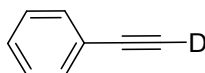

Colorless oil (887.0 mg, 86% yield).  $^1\text{H}$  NMR (400 MHz,  $\text{CDCl}_3$ ):  $\delta$  7.51 (d,  $J = 6.0$  Hz, 2H), 7.35–7.32 (m, 3H) ;  $^{13}\text{C}$  NMR (100 MHz,  $\text{CDCl}_3$ )  $\delta$  132.3, 129.0, 128.5, 122.4, 83.5, 83.4.

## 3. Representative Procedure for Palladium-Catalyzed Carbonylative Addition Reaction of Aryl Bromides to Arylalkynes.

4-Acetylphenyl bromide (**1a**, 99.5 mg, 0.5 mmol), 4-methoxyphenyl acetylene (**2a**, 198.2 mg, 1.5 mmol), *i*Pr<sub>2</sub>NEt (248  $\mu$ L, 1.5 mmol), PdCl<sub>2</sub> (8.7 mg, 0.05 mmol), DPPB (42.6 mg, 0.1 mmol), and DMF (3.0 mL) were placed in a 25 mL autoclave with a magnetic stir bar under a N<sub>2</sub> atmosphere. The autoclave was purged with CO three times, filled with CO to 15 atm pressure, and heated to 120 °C for 36 h. The autoclave was allowed to cool to room temperature and the remaining CO was vented. Then water (5 mL) was added to the resultant mixture. The product was extracted with ethyl acetate (5 mL  $\times$  3), and the combined organic layers were washed with brine (5 mL  $\times$  2), dried over Na<sub>2</sub>SO<sub>4</sub>. The solvent was removed under reduced pressure, and the residue obtained was purified via silica gel chromatography (eluent: petroleum ether/ethyl acetate = 5:1) to afford (*E*)-1-(4-acetylphenyl)-3-(4-methoxyphenyl) prop-2-en-1-one (**3a**) as a pale yellow solid (123.3 mg, 88% yield).

**(*E*)-1-(4-Acetylphenyl)-3-(4-methoxyphenyl)prop-2-en-1-one (**3a**)**<sup>[2]</sup>

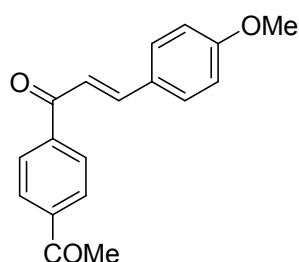

Pale yellow solid (123.3 mg, 88% yield), mp 120–122 °C. <sup>1</sup>H NMR (400 MHz, CDCl<sub>3</sub>)  $\delta$  8.22 (s, 4H), 7.95 (d, *J* = 15.6 Hz, 1H), 7.77 (d, *J* = 8.0 Hz, 2H), 7.55 (d, *J* = 15.6 Hz, 1H), 7.10 (d, *J* = 8.4 Hz, 2H), 4.02 (s, 3H), 2.82 (s, 3H); <sup>13</sup>C NMR (100 MHz, CDCl<sub>3</sub>)  $\delta$  197.7, 190.1, 162.1, 145.8, 39.7, 130.6, 128.7, 128.6, 127.4, 119.5, 114.6, 55.6, 27.0.

**(*E*)-1-(4-Acetylphenyl)-3-phenylprop-2-en-1-one (**3b**)**

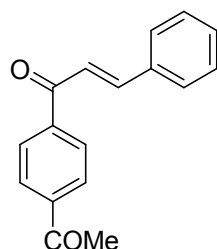

White solid (105.1 mg, 84% yield), mp 100–102 °C. <sup>1</sup>H NMR (400 MHz, CDCl<sub>3</sub>)  $\delta$  8.07 (s, 4H), 7.82 (d, *J* = 15.6 Hz, 1H), 7.67–7.64 (m, 2H), 7.51 (d, *J* = 15.6 Hz, 1H), 7.45–7.42 (m, 3H), 2.66 (s, 3H); <sup>13</sup>C NMR (100 MHz, CDCl<sub>3</sub>)  $\delta$  197.7, 190.1, 146.0, 141.7, 139.9, 134.7, 131.0, 129.2, 128.8, 128.73, 128.65, 121.9, 27.1; IR (KBr) 3041,

3000, 1681, 1656, 1607, 1594, 1573, 770  $\text{cm}^{-1}$ ; HRMS (EI) calcd for  $\text{C}_{18}\text{H}_{16}\text{O}_2$ : 250.0994  $[\text{M}]^+$ ; found: 250.0982.

**(E)-1-(4-Acetylphenyl)-3-(4-(dimethylamino)phenyl)prop-2-en-1-one (3c)**

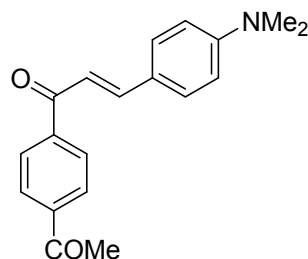

Yellow solid (129.1 mg, 88% yield), mp 116–118 °C.  $^1\text{H}$  NMR (400 MHz,  $\text{CDCl}_3$ )  $\delta$  8.05 (s, 4H), 7.80 (d,  $J = 15.6$  Hz, 1H), 7.55 (d,  $J = 8.8$  Hz, 2H), 7.30 (d,  $J = 15.2$  Hz, 1H), 6.69 (d,  $J = 8.8$  Hz, 2H), 3.05 (s, 6H), 2.65 (s, 3H);  $^{13}\text{C}$  NMR (100 MHz,  $\text{CDCl}_3$ )  $\delta$  197.9, 190.2, 152.5, 147.1, 142.9, 139.5, 128.62, 128.59, 122.5, 116.7, 112.0, 40.3, 27.1; IR (KBr) 2911, 1751, 1684, 1650, 1674, 1550, 1525, 1367, 1186, 1169, 812  $\text{cm}^{-1}$ ; HRMS (EI) calcd for  $\text{C}_{19}\text{H}_{19}\text{NO}_2$ : 293.1416  $[\text{M}]^+$ ; found: 293.1418.

**(E)-1-(4-Acetylphenyl)-3-(4-butylphenyl)prop-2-en-1-one (3d)**

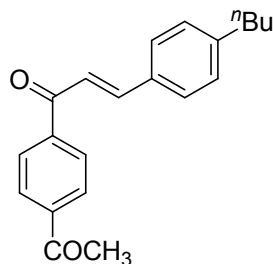

Pale yellow solid (131.8 mg, 86% yield), mp 132–134 °C.  $^1\text{H}$  NMR (400 MHz,  $\text{CDCl}_3$ )  $\delta$  8.07 (s, 4H), 7.81 (d,  $J = 15.6$  Hz, 1H), 7.57 (d,  $J = 8.0$  Hz, 2H), 7.47 (d,  $J = 15.6$  Hz, 1H), 7.24 (d,  $J = 8.0$  Hz, 2H), 2.66–2.63 (m, 5H), 1.65–1.58 (m, 2H), 1.41–1.32 (m, 2H), 0.94 (t,  $J = 7.2$  Hz, 3H);  $^{13}\text{C}$  NMR (100 MHz,  $\text{CDCl}_3$ )  $\delta$  197.6, 190.1, 146.7, 146.1, 141.9, 139.8, 132.1, 129.2, 128.8, 128.7, 128.6, 120.9, 35.7, 33.5, 27.0, 22.4, 14.1; IR (KBr) 2955, 2923, 2855, 1677, 1657, 1610, 1600, 981, 961, 840, 820  $\text{cm}^{-1}$ ; HRMS ( $\text{ES}^+$ ) calcd for  $\text{C}_{21}\text{H}_{22}\text{O}_2\text{Na}$ : 329.1517  $[\text{M}+\text{Na}]^+$ ; found: 329.1515.

**(E)-1-(4-Acetylphenyl)-3-(4-(4-propylcyclohexyl)phenyl)prop-2-en-1-one (3e)**

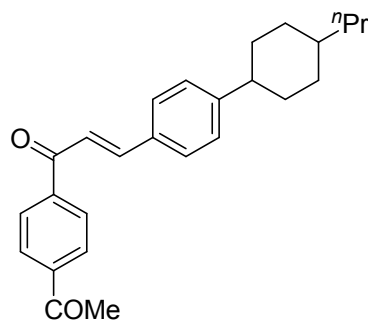

Pale yellow solid (149.8 mg, 80% yield), mp 138–140 °C. <sup>1</sup>H NMR (400 MHz, CDCl<sub>3</sub>) δ 8.06 (s, 4H), 7.81 (d, *J* = 15.6 Hz, 1H), 7.58 (d, *J* = 8.0 Hz, 2H), 7.47 (d, *J* = 15.6 Hz, 1H), 7.27 (d, *J* = 8.4 Hz, 2H), 2.67 (s, 3H), 2.54–2.47 (m, 1H), 1.91–1.86 (m, 4H), 1.51–1.00 (m, 9H), 0.90 (t, *J* = 7.2 Hz, 3H); <sup>13</sup>C NMR (100 MHz, CDCl<sub>3</sub>) δ 197.7, 190.2, 151.6, 146.2, 139.8, 128.7, 127.1, 120.9, 44.8, 37.1, 33.5, 27.0, 20.1, 14.6; IR (KBr) 2953, 2919, 2846, 1681, 1656, 1592, 1562, 1309, 1262, 988, 819 cm<sup>-1</sup>; HRMS (ES<sup>+</sup>) calcd for C<sub>26</sub>H<sub>30</sub>O<sub>2</sub>Na: 397.2144 [M+Na]<sup>+</sup>; found: 397.2148.

**(*E*)-1-(4-Acetylphenyl)-3-(*o*-tolyl)prop-2-en-1-one (3f)**

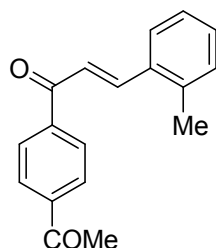

Pale yellow solid (108.4 mg, 82% yield), mp 102–104 °C. <sup>1</sup>H NMR (400 MHz, CDCl<sub>3</sub>) δ 8.14 (d, *J* = 15.6 Hz, 1H), 8.09 (s, 4H), 7.71 (d, *J* = 7.6 Hz, 1H), 7.44 (d, *J* = 15.6 Hz, 1H), 7.35–7.24 (m, 3H), 2.67 (s, 3H), 2.48 (s, 3H); <sup>13</sup>C NMR (100 MHz, CDCl<sub>3</sub>) δ 197.7, 190.7, 143.6, 141.8, 140.0, 138.7, 133.7, 131.2, 130.8, 128.8, 128.7, 126.60, 126.57, 122.9, 27.1, 20.0; IR (KBr) 3054, 1680, 1658, 1595, 1313, 976, 761 cm<sup>-1</sup>; HRMS (EI) calcd for C<sub>18</sub>H<sub>16</sub>O<sub>2</sub>: 264.1150 [M]<sup>+</sup>; found: 264.1159.

**(*E*)-1-(4-Acetylphenyl)-3-(*m*-tolyl)prop-2-en-1-one (3g)**

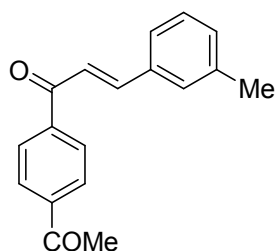

Pale yellow solid (103.1 mg, 78% yield), mp 98–100 °C. <sup>1</sup>H NMR (400 MHz, CDCl<sub>3</sub>) δ 8.07 (s, 4H), 7.80 (d, *J* = 16.0 Hz, 1H), 7.52–7.45 (m, 3H), 7.32 (dd, *J* = 8.0, 8.0 Hz, 1H), 7.25 (d, *J* = 7.6 Hz, 1H), 2.67 (s, 3H), 2.40 (s, 3H); <sup>13</sup>C NMR (100 MHz, CDCl<sub>3</sub>) δ 197.6, 190.1, 146.2, 141.7, 139.8, 138.8, 134.6, 131.9, 129.3, 129.0, 128.7, 128.6, 125.9, 121.6, 27.0, 21.4; IR (KBr) 3015, 2920, 1686, 1663, 1596, 1264, 1239, 1031, 1012, 784 cm<sup>-1</sup>; HRMS (EI) calcd for C<sub>18</sub>H<sub>16</sub>O<sub>2</sub>: 264.1150 [M]<sup>+</sup>; found: 264.1143.

**(*E*)-1-(4-Acetylphenyl)-3-(*p*-tolyl)prop-2-en-1-one (3h)**

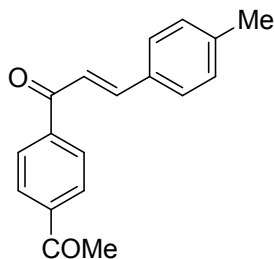

Pale yellow solid (113.7 mg, 86% yield), mp 120–122 °C.  $^1\text{H}$  NMR (400 MHz,  $\text{CDCl}_3$ )  $\delta$  8.07 (s, 4H), 7.80 (d,  $J = 15.6$  Hz, 1H), 7.55 (d,  $J = 8.0$  Hz, 2H), 7.47 (d,  $J = 15.6$  Hz, 1H), 7.23 (d,  $J = 8.0$  Hz, 2H), 2.66 (s, 3H), 2.40 (s, 3H);  $^{13}\text{C}$  NMR (100 MHz,  $\text{CDCl}_3$ )  $\delta$  197.7, 190.2, 146.1, 141.9, 141.7, 139.8, 131.9, 129.9, 128.74, 128.72, 128.6, 120.9, 27.0, 21.7; IR (KBr) 2927, 1679, 1652, 1593, 1561, 981, 809  $\text{cm}^{-1}$ ; HRMS (EI) calcd for  $\text{C}_{18}\text{H}_{16}\text{O}_2$ : 264.1150  $[\text{M}]^+$ ; found: 264.1138.

**(E)-3-(4-(1,3-Dioxolan-2-yl)phenyl)-1-(4-acetylphenyl)prop-2-en-1-one (3k)**

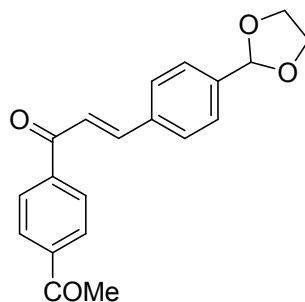

Pale yellow solid (129.0 mg, 80% yield), mp 136–138 °C.  $^1\text{H}$  NMR (400 MHz,  $\text{CDCl}_3$ )  $\delta$  8.08 (s, 4H), 7.83 (d,  $J = 16.0$  Hz, 1H), 7.68 (d,  $J = 8.0$  Hz, 2H), 7.56–7.51 (m, 3H), 5.85 (s, 1H), 4.11 (t,  $J = 17.2$  Hz, 4H), 2.67 (s, 3H);  $^{13}\text{C}$  NMR (100 MHz,  $\text{CDCl}_3$ )  $\delta$  197.6, 189.9, 145.3, 141.5, 140.6, 139.9, 135.4, 128.7, 128.62, 128.55, 127.2, 122.2, 65.4, 27.0; IR (KBr) 2957, 2888, 1680, 1657, 1597, 1077, 1012, 952, 818  $\text{cm}^{-1}$ ; HRMS ( $\text{ES}^+$ ) calcd for  $\text{C}_{20}\text{H}_{18}\text{O}_4\text{Na}$ : 345.1103  $[\text{M}+\text{Na}]^+$ ; found: 345.1109.

**(E)-1-(4-Acetylphenyl)-3-(naphthalen-1-yl)prop-2-en-1-one (3l)**

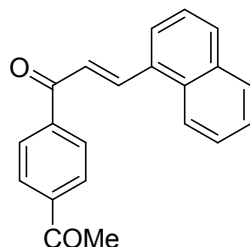

Pale yellow solid (123.2 mg, 82% yield), mp 118–120 °C.  $^1\text{H}$  NMR (400 MHz,  $\text{CDCl}_3$ )  $\delta$  8.69 (d,  $J = 15.2$  Hz, 1H), 8.23 (d,  $J = 8.4$  Hz, 1H), 8.13 (d,  $J = 8.8$  Hz, 2H), 8.08 (d,  $J = 8.4$  Hz, 2H), 7.95–7.88 (m, 3H), 7.62–7.51 (m, 4H), 2.66 (s, 3H);  $^{13}\text{C}$

NMR (100 MHz, CDCl<sub>3</sub>)  $\delta$  197.7, 189.9, 142.8, 141.7, 140.0, 133.9, 132.1, 131.9, 131.4, 129.0, 128.9, 128.7, 127.3, 126.5, 125.6, 125.4, 124.3, 123.5, 27.1; IR (KBr) 3055, 1686, 1660, 1595, 1500, 1433, 1401, 1348, 1310, 1258, 1216, 798, 775 cm<sup>-1</sup>; HRMS (EI) calcd for C<sub>21</sub>H<sub>16</sub>O<sub>2</sub>: 300.1150 [M]<sup>+</sup>; found: 300.1147.

**(E)-1-(3-Acetylphenyl)-3-(4-methoxyphenyl)prop-2-en-1-one (4b)**

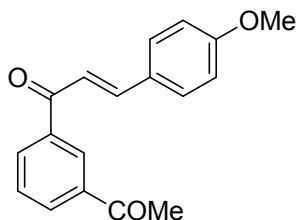

Pale yellow solid (98.1 mg, 70% yield), mp 78–80 °C. <sup>1</sup>H NMR (400 MHz, CDCl<sub>3</sub>)  $\delta$  8.58 (s, 1H), 8.22 (d, *J* = 7.6 Hz, 1H), 8.17 (d, *J* = 7.6 Hz, 1H), 7.84 (d, *J* = 15.6 Hz, 1H), 7.64–7.60 (m, 3H), 7.45 (d, *J* = 15.6 Hz, 1H), 6.95 (d, *J* = 8.4 Hz, 2H), 3.87 (s, 3H), 2.69 (s, 3H); <sup>13</sup>C NMR (100 MHz, CDCl<sub>3</sub>)  $\delta$  197.7, 189.7, 162.0, 145.7, 137.5, 132.2, 129.2, 127.5, 119.2, 114.6, 114.3, 55.6, 27.0; IR (KBr) 3008, 2933, 2838, 1687, 1660, 1596, 1511, 1423, 1255, 1196, 1172, 1030, 830 cm<sup>-1</sup>; HRMS (EI) calcd for C<sub>18</sub>H<sub>16</sub>O<sub>3</sub>: 280.1099 [M]<sup>+</sup>; found: 280.1094.

**(E)-1-(2-Acetylphenyl)-3-(4-methoxyphenyl)prop-2-en-1-one (4c)**

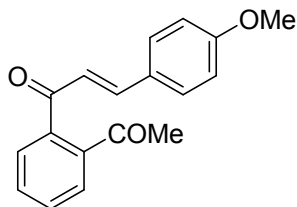

Pale yellow solid (100.9 mg, 72% yield), mp 106–108 °C. <sup>1</sup>H NMR (400 MHz, CDCl<sub>3</sub>)  $\delta$  8.07 (s, 4H), 7.80 (d, *J* = 15.6 Hz, 1H), 7.62 (d, *J* = 8.8 Hz, 2H), 7.39 (d, *J* = 15.6 Hz, 1H), 6.95 (d, *J* = 8.4 Hz, 2H), 3.86 (s, 3H), 2.67 (s, 3H); <sup>13</sup>C NMR (100 MHz, CDCl<sub>3</sub>)  $\delta$  197.7, 190.1, 162.1, 145.9, 142.1, 139.8, 130.6, 128.7, 128.6, 127.5, 119.6, 114.6, 55.6, 27.0; IR (KBr) 3000, 2933, 2836, 1680, 1657, 1589, 1510, 1256, 1214, 1171, 1031, 818 cm<sup>-1</sup>; HRMS (ES<sup>+</sup>) calcd for C<sub>18</sub>H<sub>16</sub>O<sub>3</sub>Na: 303.0997 [M+Na]<sup>+</sup>; found: 303.0990.

**(E)-3-(4-Methoxyphenyl)-1-(4-(trifluoromethyl)phenyl)prop-2-en-1-one (4d)**

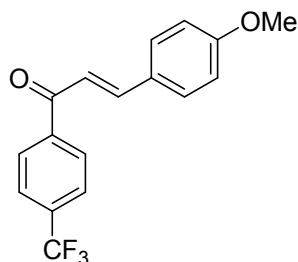

Yellow solid (119.5 mg, 78% yield), mp 116–118 °C.  $^1\text{H}$  NMR (400 MHz,  $\text{CDCl}_3$ )  $\delta$  8.09 (d,  $J = 8.0$  Hz, 2H), 7.83–7.75 (m, 3H), 7.62 (d,  $J = 8.8$  Hz, 2H), 7.37 (d,  $J = 15.6$  Hz, 1H), 6.95 (d,  $J = 8.4$  Hz, 2H), 3.87 (s, 3H);  $^{13}\text{C}$  NMR (100 MHz,  $\text{CDCl}_3$ )  $\delta$  189.7, 162.0, 146.0, 141.4, 133.4 (q,  $^2J = 32.5$  Hz), 130.5, 128.7, 127.2, 125.6, 123.7 (q,  $^1J = 270.7$  Hz), 119.2, 114.5, 55.4; IR (KBr) 2963, 2841, 1659, 1600, 1572, 1512, 1328, 1257, 1159, 1116, 983, 831  $\text{cm}^{-1}$ ; HRMS (EI) calcd for  $\text{C}_{17}\text{H}_{13}\text{O}_2\text{F}_3$ : 306.0868  $[\text{M}]^+$ ; found: 306.0874.

**(E)-4-(3-(4-Methoxyphenyl)acryloyl)benzaldehyde (4e)**

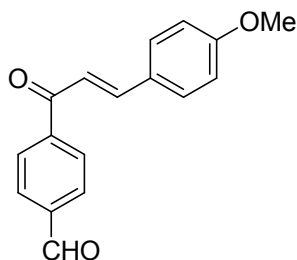

Pale yellow solid (106.6 mg, 80% yield), mp 100–102 °C.  $^1\text{H}$  NMR (400 MHz,  $\text{CDCl}_3$ )  $\delta$  10.11 (s, 1H), 8.13 (d,  $J = 8.4$  Hz, 2H), 8.00 (d,  $J = 8.0$  Hz, 2H), 7.80 (d,  $J = 16.0$  Hz, 1H), 7.61 (d,  $J = 8.8$  Hz, 2H), 7.39 (d,  $J = 16.0$  Hz, 1H), 6.94 (d,  $J = 8.4$  Hz, 2H), 3.86 (s, 3H);  $^{13}\text{C}$  NMR (100 MHz,  $\text{CDCl}_3$ )  $\delta$  191.7, 189.9, 162.0, 146.0, 143.1, 138.5, 130.5, 129.8, 128.9, 127.2, 119.3, 114.5, 55.4; IR (KBr) 2838, 1703, 1659, 1590, 1570, 1511, 1257, 1212, 1174, 1032, 818, 807  $\text{cm}^{-1}$ ; HRMS (EI) calcd for  $\text{C}_{17}\text{H}_{14}\text{O}_3$ : 266.0943  $[\text{M}]^+$ ; found: 266.0942.

**(E)-Methyl 4-(3-(4-methoxyphenyl)acryloyl)benzoate (4f)**

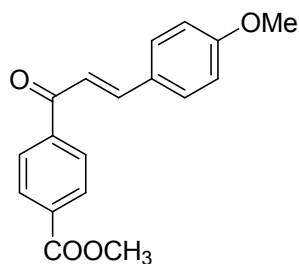

Yellow solid (120.0 mg, 81% yield), mp 138–140 °C.  $^1\text{H}$  NMR (400 MHz,  $\text{CDCl}_3$ )  $\delta$  8.16 (d,  $J = 8.4$  Hz, 2H), 8.04 (d,  $J = 8.4$  Hz, 2H), 7.80 (d,  $J = 15.6$  Hz, 1H), 7.61 (d,  $J = 8.8$  Hz, 2H), 7.39 (d,  $J = 15.6$  Hz, 1H), 6.95 (d,  $J = 8.8$  Hz, 2H), 3.96 (s, 3H), 3.86 (s, 3H);  $^{13}\text{C}$  NMR (100 MHz,  $\text{CDCl}_3$ )  $\delta$  190.2, 166.5, 162.0, 145.8, 142.1, 130.5, 129.9, 128.4, 127.4, 119.6, 114.6, 55.6, 52.6; IR (KBr) 2951, 2844, 1713, 1655, 1593, 1511, 1281, 1106, 829  $\text{cm}^{-1}$ ; HRMS (EI) calcd for  $\text{C}_{18}\text{H}_{16}\text{O}_4$ : 296.1049  $[\text{M}]^+$ ; found: 296.1096.

**(E)-4-(3-(4-Methoxyphenyl)acryloyl)benzotrile (4g)**



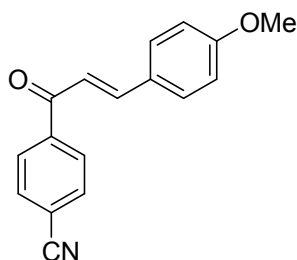

Yellow solid (118.5 mg, 90% yield), mp 122–124 °C.  $^1\text{H}$  NMR (400 MHz,  $\text{CDCl}_3$ )  $\delta$  8.07 (d,  $J = 8.8$  Hz, 2H), 7.83–7.79 (m, 3H), 7.61 (d,  $J = 8.4$  Hz, 2H), 7.34 (d,  $J = 15.6$  Hz, 1H), 6.95 (d,  $J = 8.8$  Hz, 2H), 3.87 (s, 3H);  $^{13}\text{C}$  NMR (100 MHz,  $\text{CDCl}_3$ )  $\delta$  186.7, 159.8, 144.1, 139.5, 128.2, 126.4, 124.7, 116.4, 115.7, 113.3, 112.2, 53.1; IR (KBr) 2938, 2839, 2224, 1657, 1597, 1573, 1512, 1424, 1293, 1252, 1212, 1176, 1035, 814  $\text{cm}^{-1}$ ; HRMS (EI) calcd for  $\text{C}_{17}\text{H}_{13}\text{NO}_2$ : 263.0946  $[\text{M}]^+$ ; found: 263.0943.

**(E)-3-(4-Methoxyphenyl)-1-(p-tolyl)prop-2-en-1-one (4i)**<sup>[3]</sup>

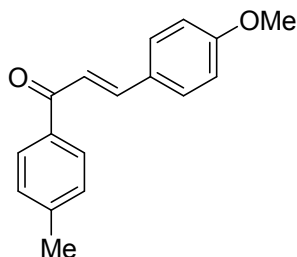

White solid (50.5 mg, 40% yield), mp 82–84 °C.  $^1\text{H}$  NMR (400 MHz,  $\text{CDCl}_3$ )  $\delta$  7.98 (d,  $J = 7.6$  Hz, 2H), 7.78 (d,  $J = 15.6$  Hz, 1H), 7.60 (d,  $J = 7.2$  Hz, 2H), 7.42 (d,  $J = 15.6$  Hz, 1H), 7.29 (d,  $J = 7.6$  Hz, 2H), 6.93 (d,  $J = 7.2$  Hz, 2H), 3.85 (s, 3H), 2.43 (s, 3H);  $^{13}\text{C}$  NMR (100 MHz,  $\text{CDCl}_3$ )  $\delta$  190.2, 161.8, 144.4, 143.6, 136.1, 129.5, 127.9, 112.0, 114.6, 55.6, 21.9.

**(E)-3-(4-Methoxyphenyl)-1-phenylprop-2-en-1-one (4j)**<sup>[4]</sup>

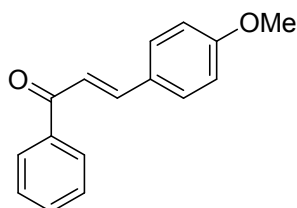

Colorless oil (62.0 mg, 52% yield).  $^1\text{H}$  NMR (400 MHz,  $\text{CDCl}_3$ )  $\delta$  8.01 (d,  $J = 7.6$  Hz, 2H), 7.79 (d,  $J = 15.6$  Hz, 1H), 7.61–7.49 (m, 5H), 7.42 (d,  $J = 15.6$  Hz, 1H), 6.94 (d,  $J = 8.8$  Hz, 2H), 3.85 (s, 3H);  $^{13}\text{C}$  NMR (100 MHz,  $\text{CDCl}_3$ )  $\delta$  190.7, 161.8, 144.9, 138.6, 128.7, 128.6, 127.7, 112.0, 114.6, 55.6.

**(E)-3-(4-Methoxyphenyl)-1-(naphthalen-1-yl)prop-2-en-1-one (4k)**<sup>[5]</sup>

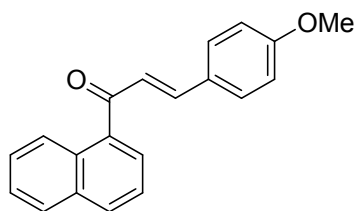

Colorless oil (83.6 mg, 58% yield).  $^1\text{H}$  NMR (400 MHz,  $\text{CDCl}_3$ )  $\delta$  8.29 (d,  $J = 8.8$  Hz, 1H), 7.97 (d,  $J = 8.4$  Hz, 1H), 7.90 (d,  $J = 7.2$  Hz, 1H), 7.73 (d,  $J = 6.4$  Hz, 1H), 7.57–7.50 (m, 6H), 7.17 (d,  $J = 16.0$  Hz, 1H), 6.90 (d,  $J = 8.8$  Hz, 2H), 3.82 (s, 3H);  $^{13}\text{C}$  NMR (100 MHz,  $\text{CDCl}_3$ )  $\delta$  196.1, 161.9, 146.1, 137.6, 133.9, 130.6, 130.4, 128.5, 127.42, 127.36, 127.0, 126.5, 125.8, 125.1, 124.7, 114.6, 55.5.

**(E)-3-Phenyl-1-(4-(trifluoromethyl)phenyl)prop-2-en-1-one (5d)**

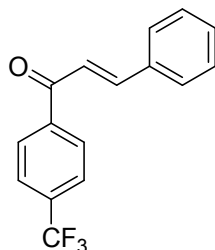

White solid (89.8 mg, 65% yield), mp 112–114 °C.  $^1\text{H}$  NMR (400 MHz,  $\text{CDCl}_3$ )  $\delta$  8.09 (d,  $J = 8.0$  Hz, 2H), 7.82 (d,  $J = 15.6$  Hz, 1H), 7.76 (d,  $J = 8.0$  Hz, 2H), 7.65–7.63 (m, 2H), 7.49 (d,  $J = 15.6$  Hz, 1H), 7.43–7.42 (m, 3H);  $^{13}\text{C}$  NMR (100 MHz,  $\text{CDCl}_3$ )  $\delta$  189.6, 146.0, 141.1, 134.6, 134.2 (q,  $^2J = 32.1$  Hz), 131.0, 129.1, 128.8, 128.6, 125.7, 123.8 (q,  $^1J = 271.2$  Hz), 121.6; IR (KBr) 3060, 3037, 1943, 1666, 1604, 1574, 1450, 1409, 1334, 1164, 1112, 985, 840  $\text{cm}^{-1}$ ; HRMS (EI) calcd for  $\text{C}_{16}\text{H}_{11}\text{F}_3\text{O}$ : 276.0762  $[\text{M}]^+$ ; found: 276.0754.

**(E)-3-Phenyl-1-(4-(trifluoromethyl)phenyl)prop-2-en-1-one- $d_2$  (5d- $d_2$ )**

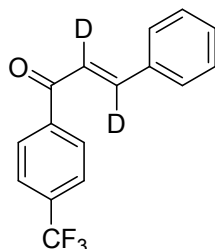

White solid (94.6 mg, 68% yield).  $^1\text{H}$  NMR (400 MHz,  $\text{CDCl}_3$ )  $\delta$  8.10 (d,  $J = 8.0$  Hz, 2H), 7.77 (d,  $J = 8.0$  Hz, 2H), 7.66 (dd,  $J = 2.4, 6.0$  Hz, 2H), 7.45–7.43 (m, 3H); HRMS (EI) calcd for  $\text{C}_{16}\text{H}_9\text{D}_2\text{F}_3\text{O}$ : 278.0888  $[\text{M}]^+$ ; found: 278.0897.

---

## 4. References

- (1) S. P. Bew, G. D. Hiatt-Gipson, J. A. Lovell, C. Poullain, *Org. Lett.*, 2012, **14**, 456.
- (2) A. Khatyr, H. Maas, G. Calzaferri, *J. Org. Chem.*, 2002, **67**, 6705.
- (3) X.-F. Wu, H. Neumann, A. Spannenberg, T. Schulz, H. Jiao, M. Beller, *J. Am. Chem. Soc.*, 2010, **132**, 14596.
- (4) K. R. Buszek, N. Brown, *Org. Lett.*, 2007, **9**, 707.
- (5) N. Ingarsal, G. Saravanan, P. Amutha, S. Nagarajan, *Eur. J. Med. Chem.*, 2007, **42**, 517.

## 5. Copies of $^1\text{H}$ and $^{13}\text{C}$ NMR Spectra of Starting Materials and Products

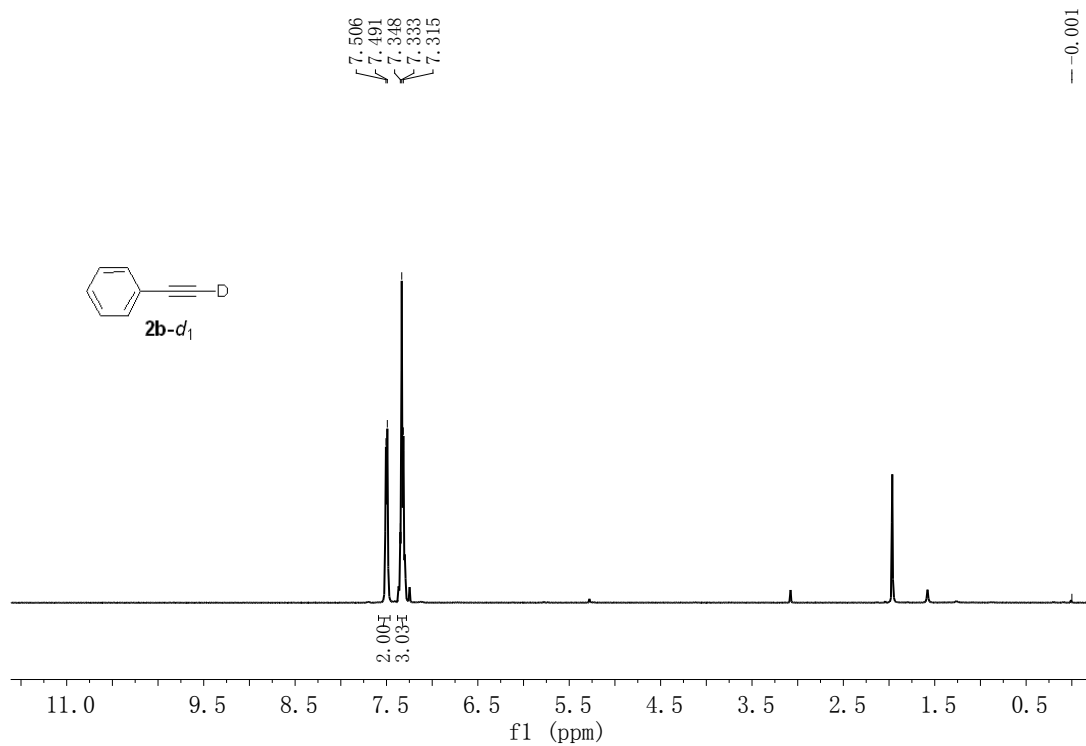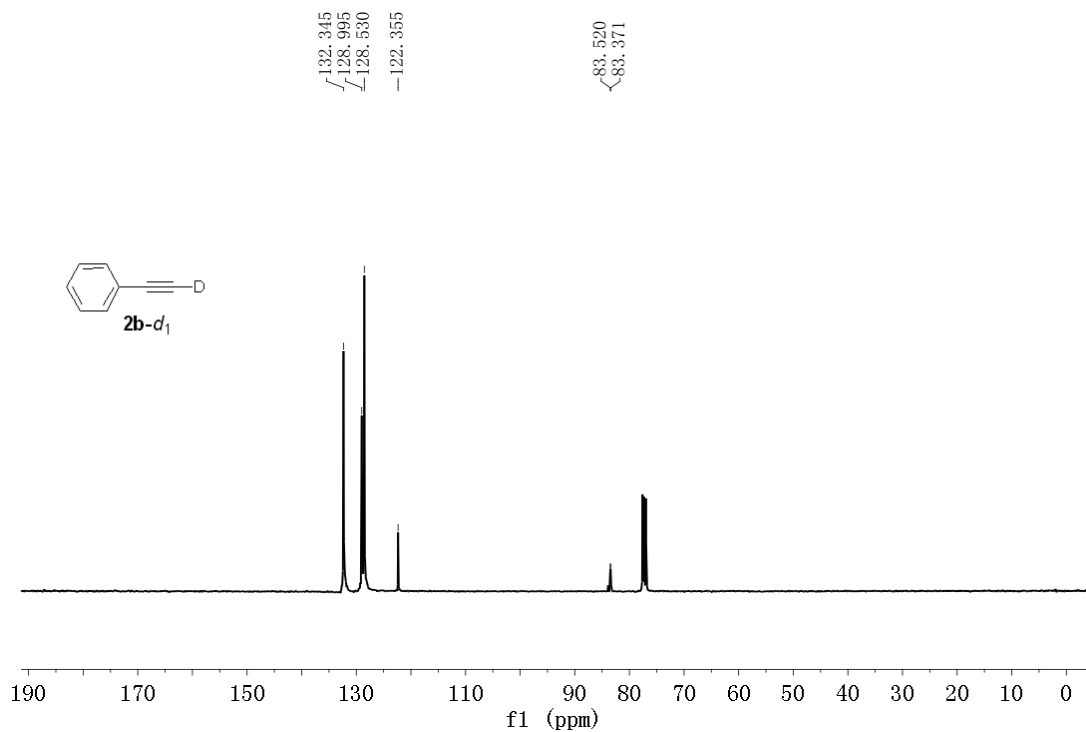

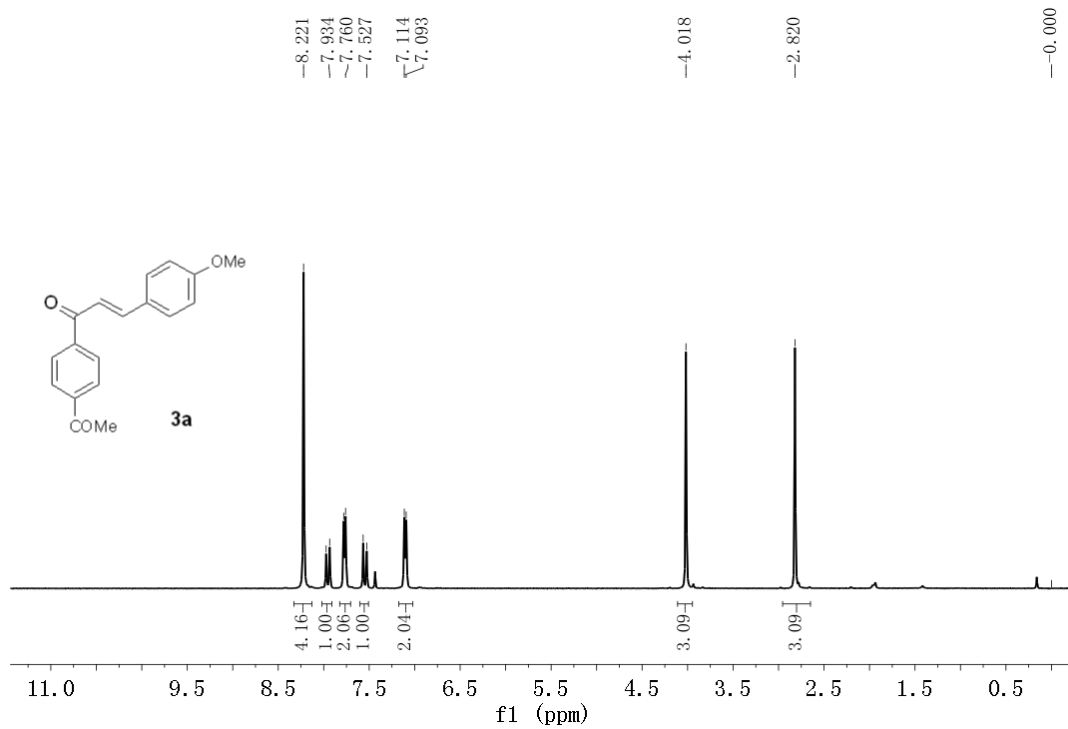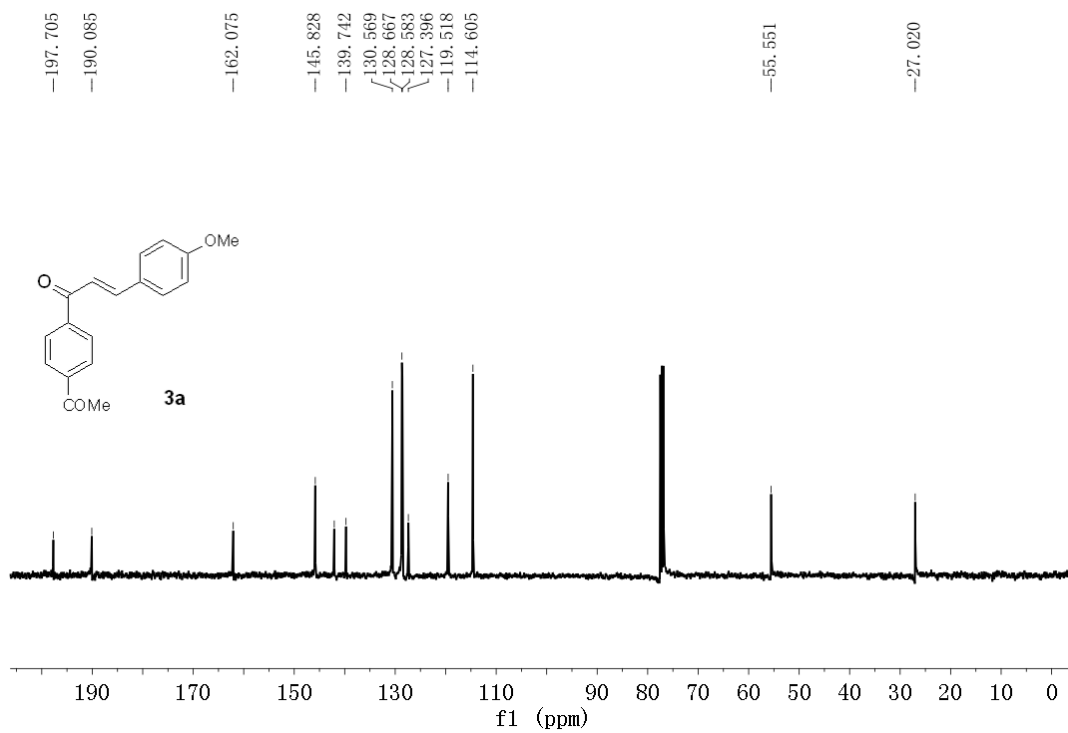

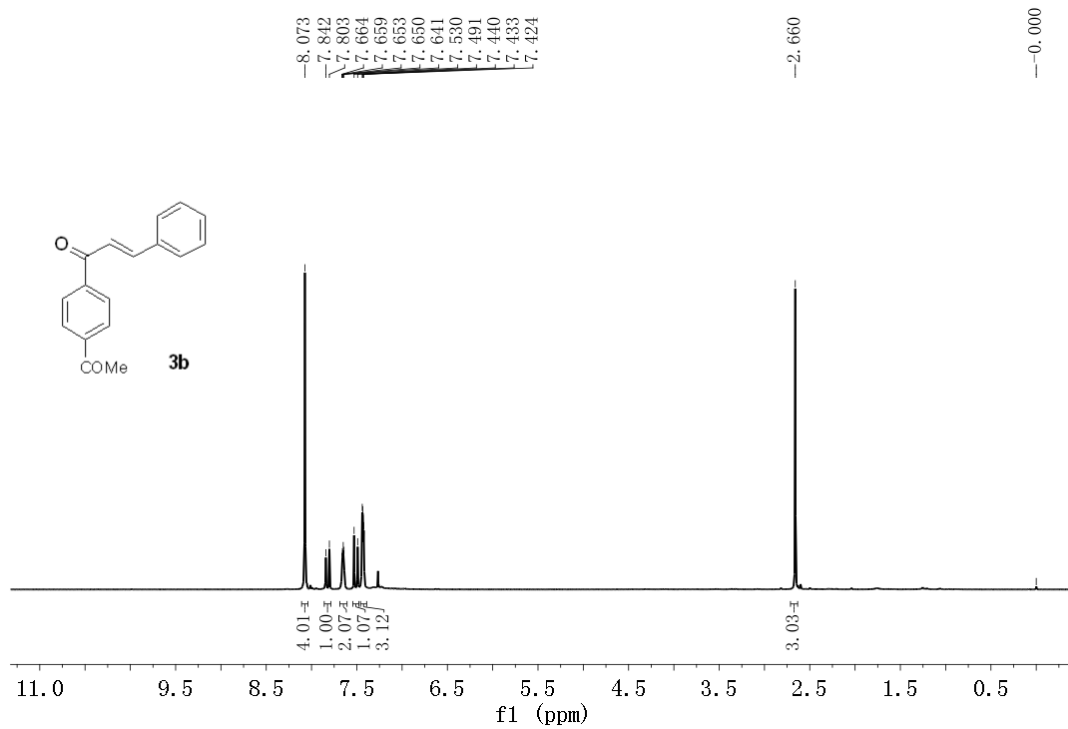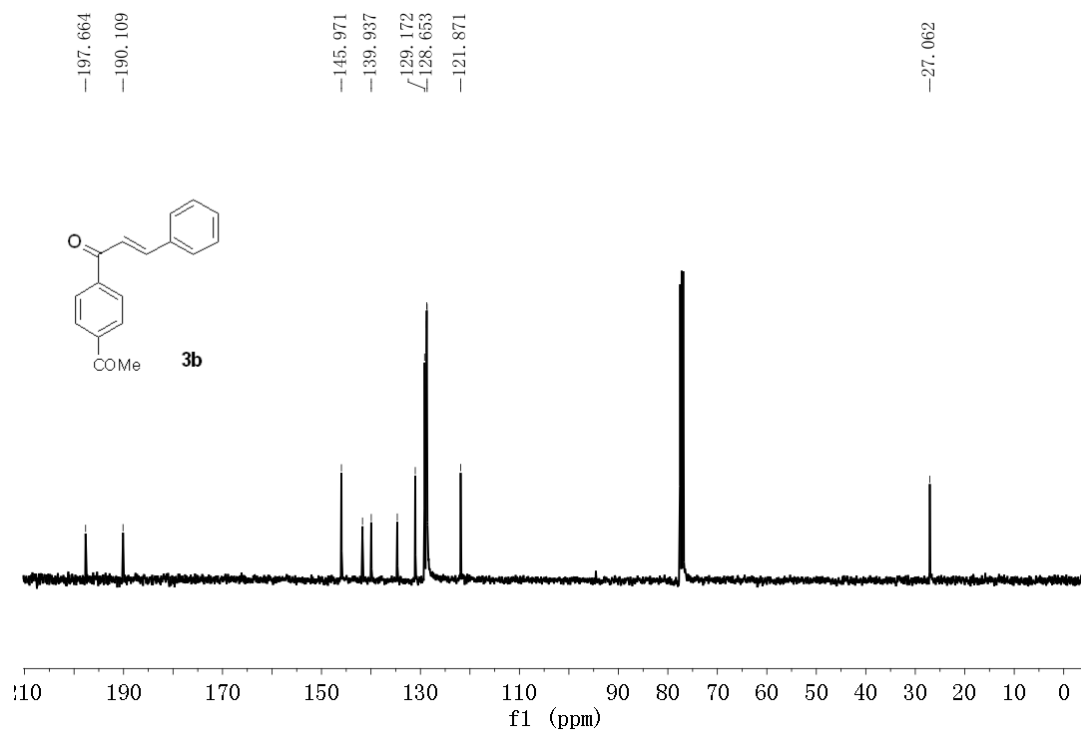

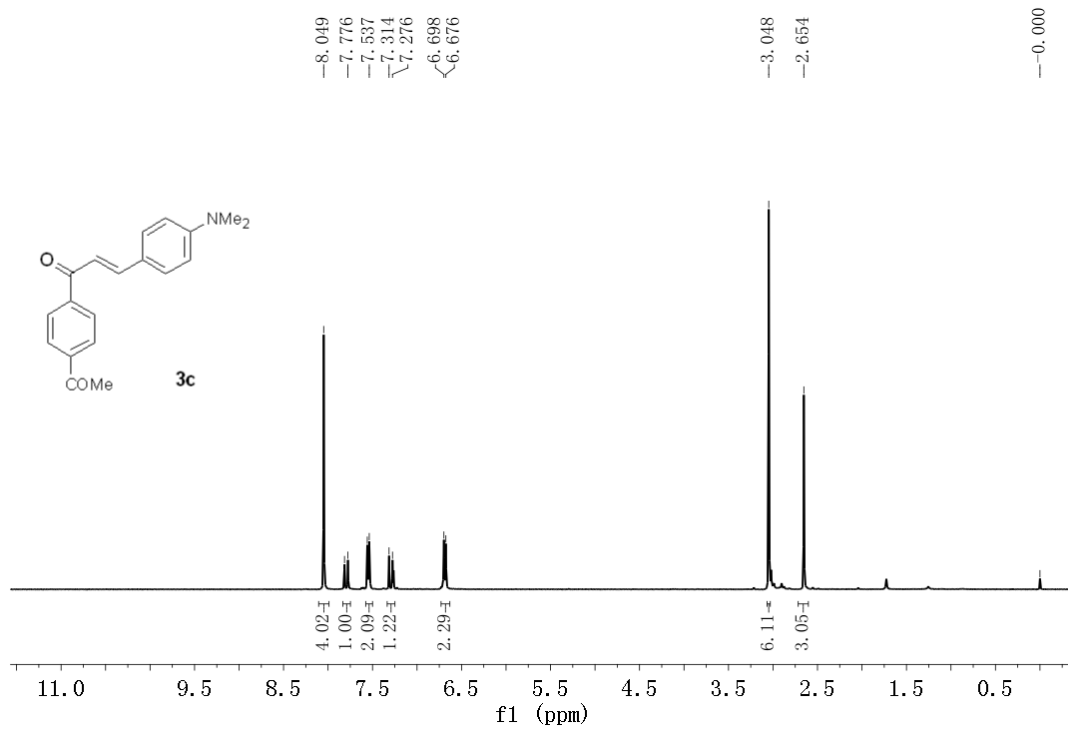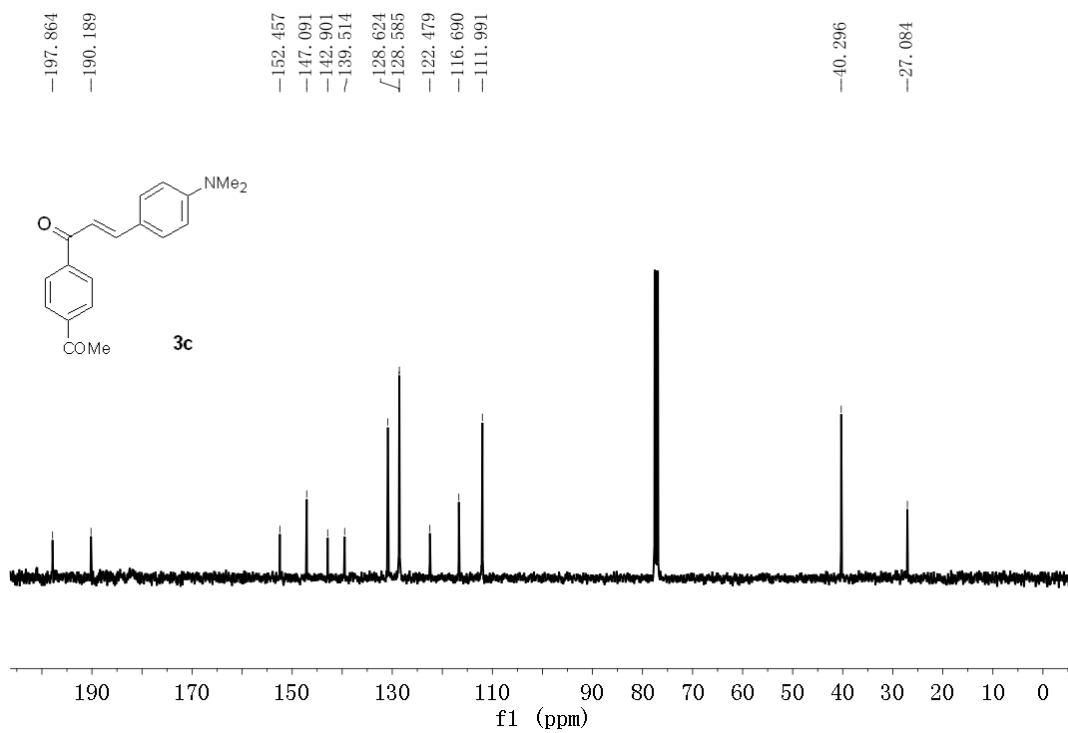

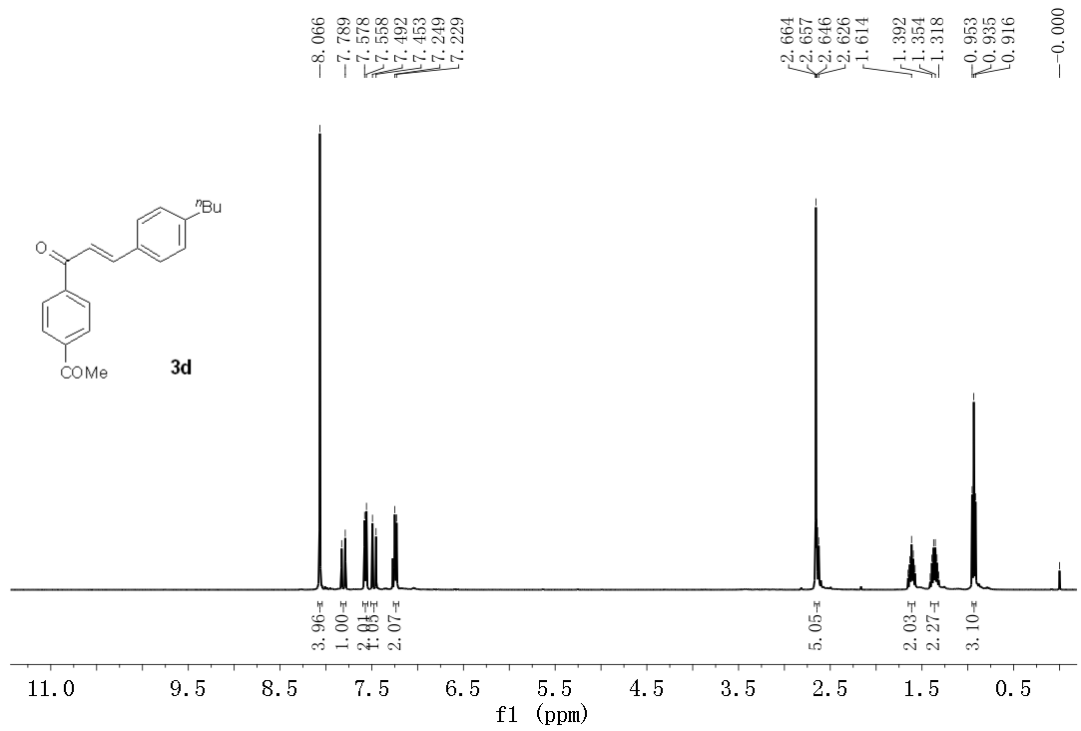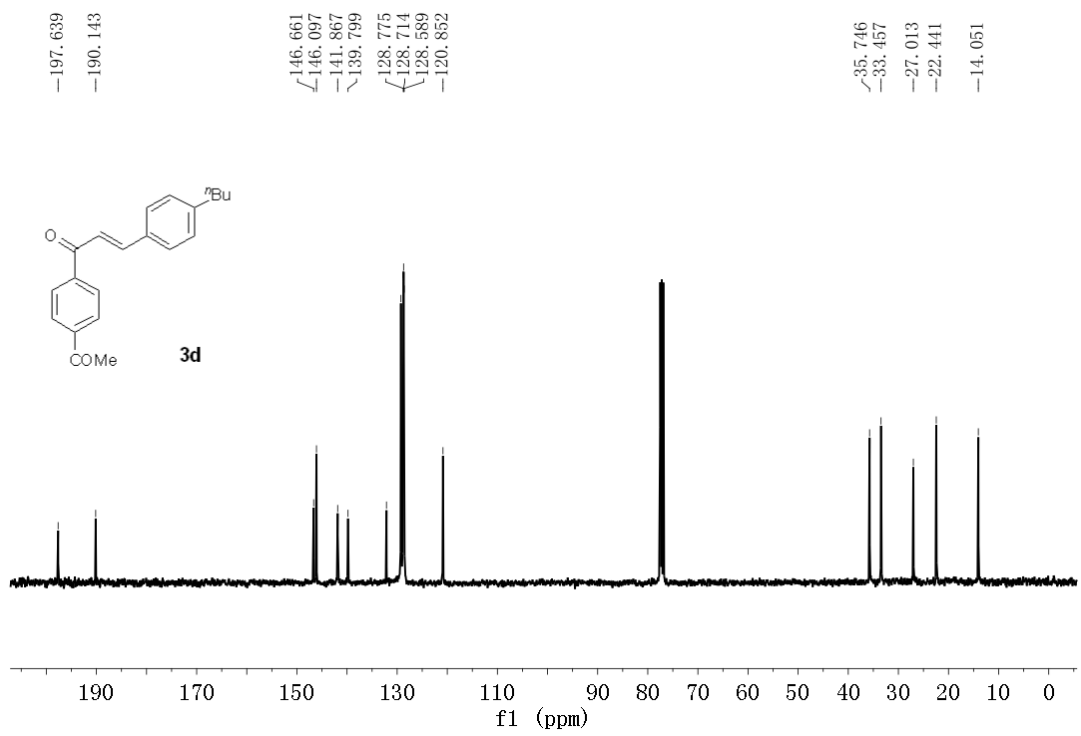



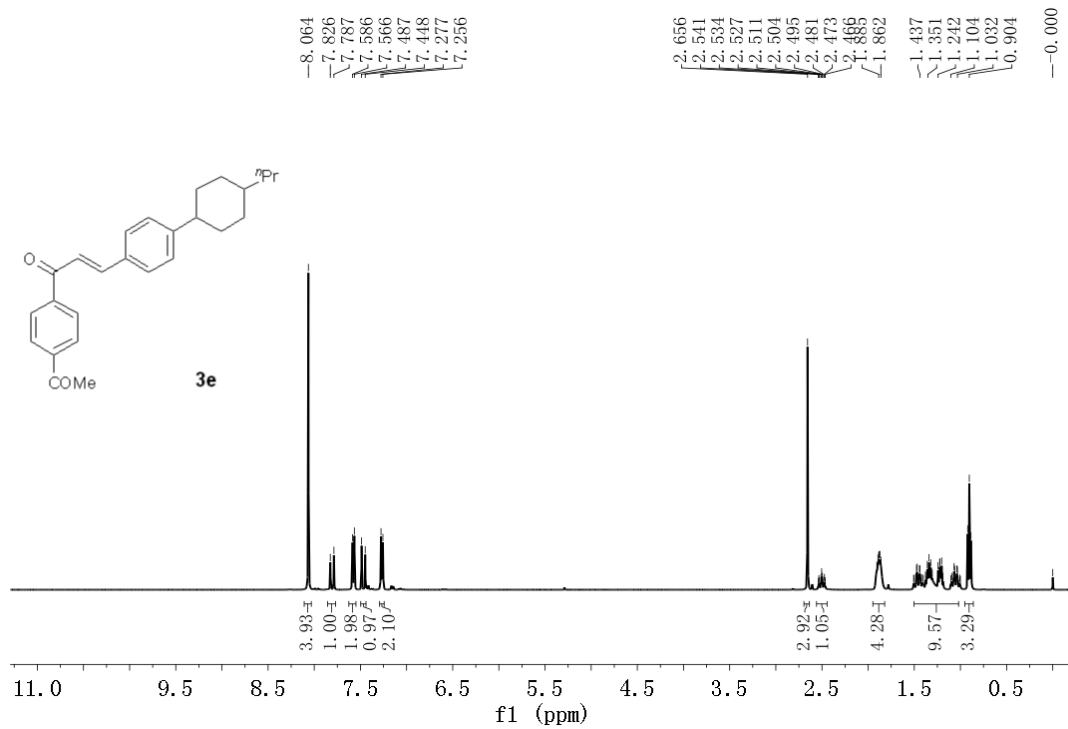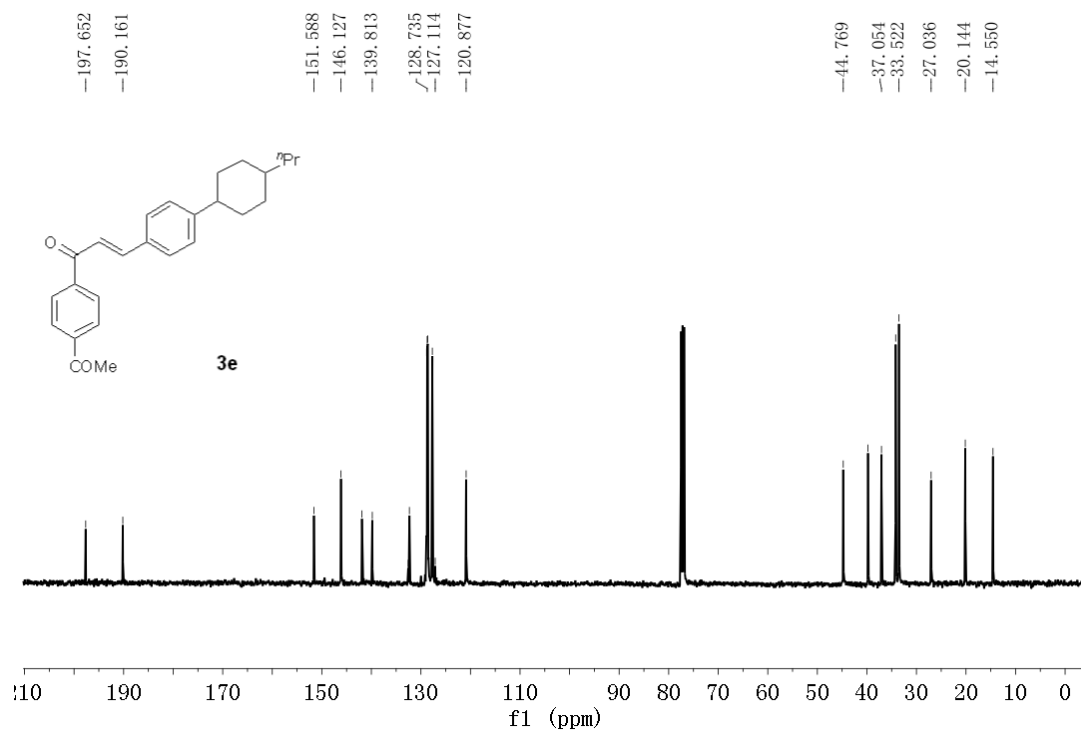

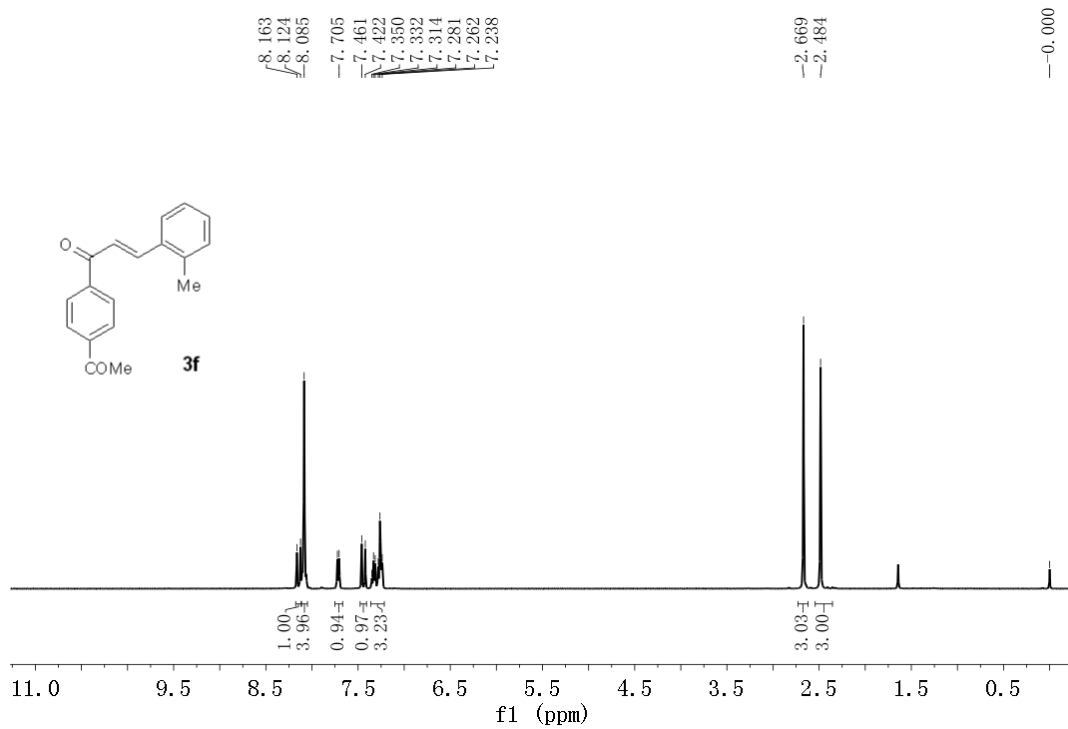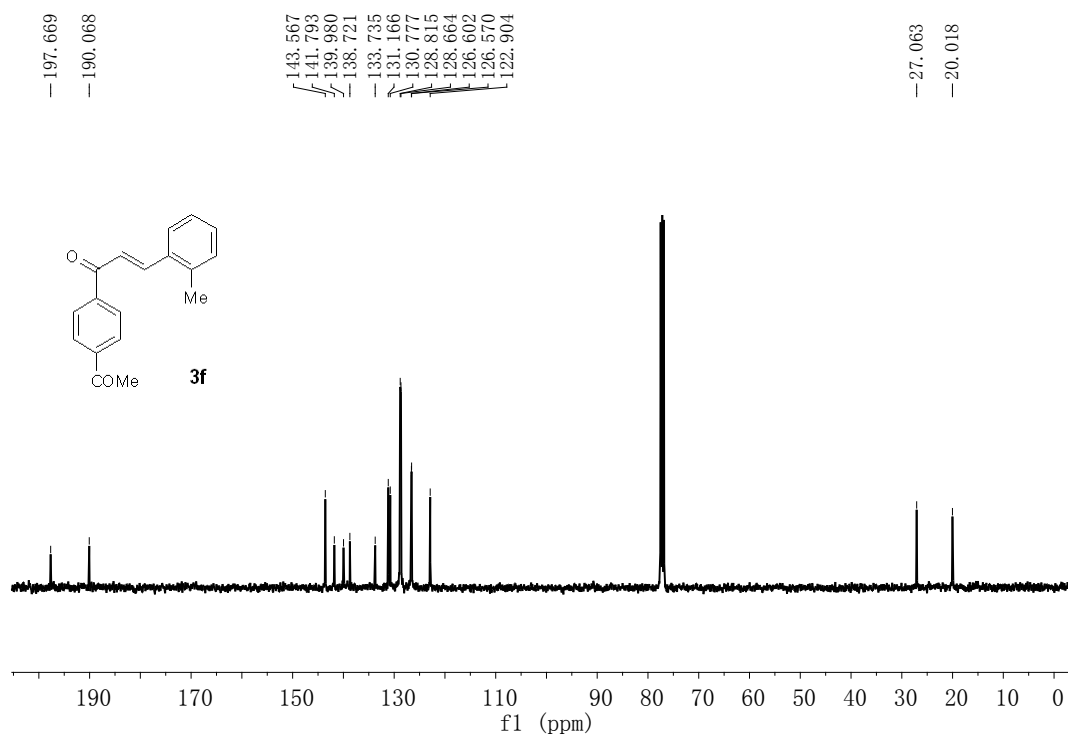

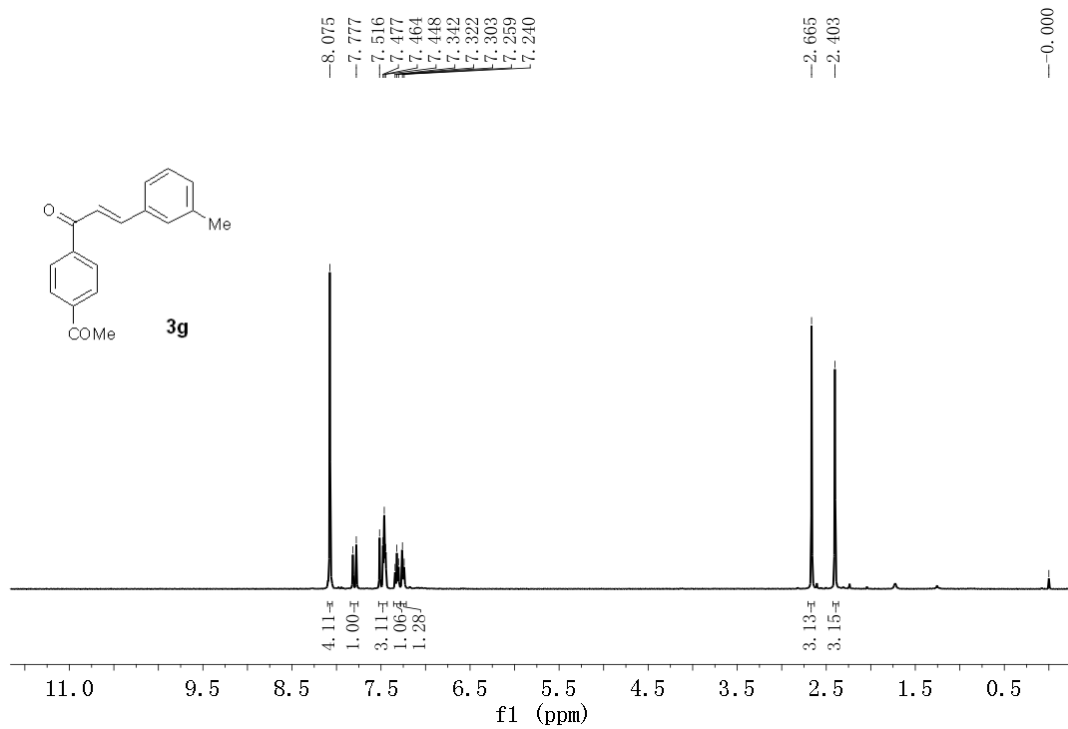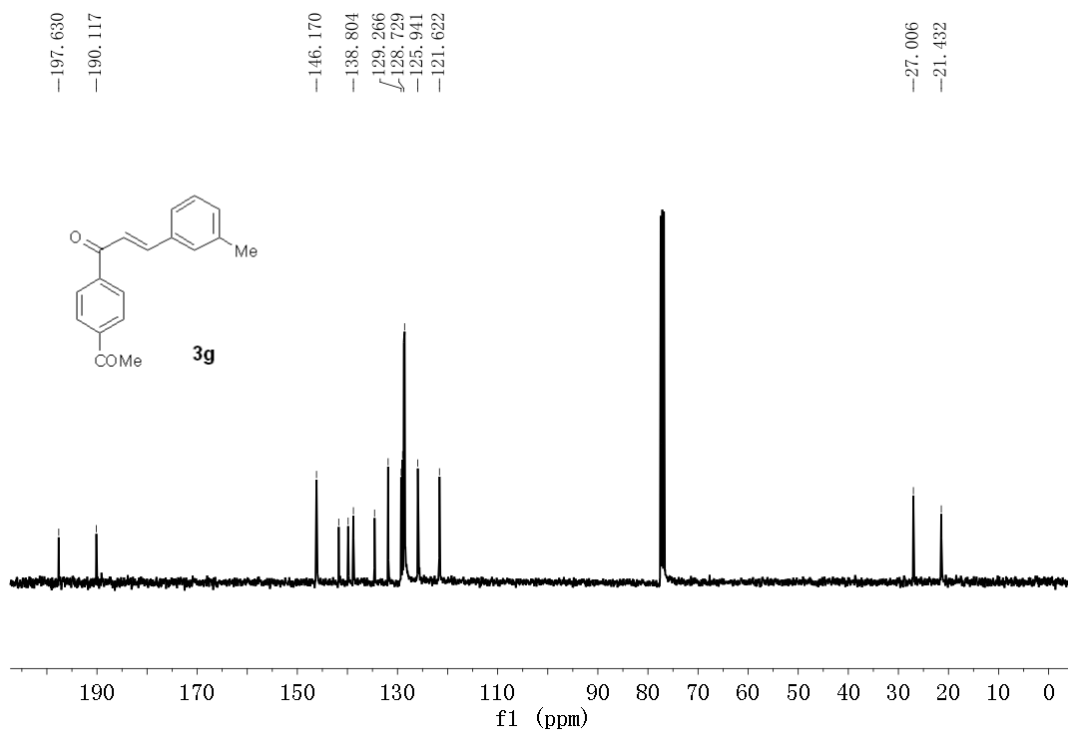

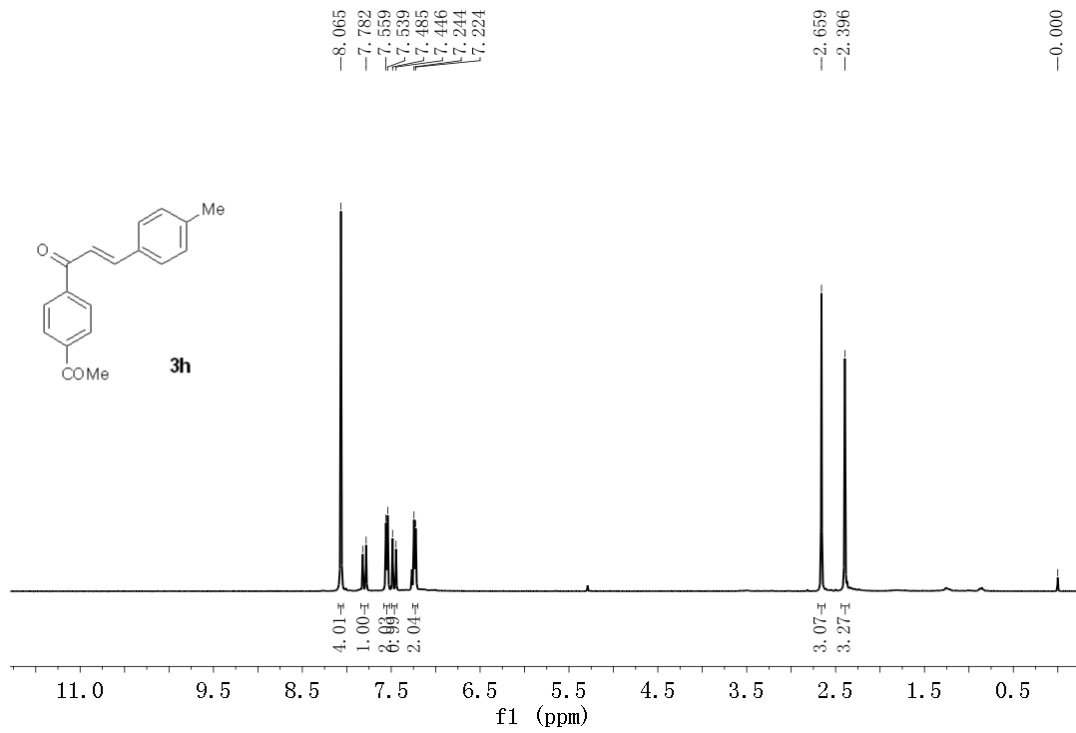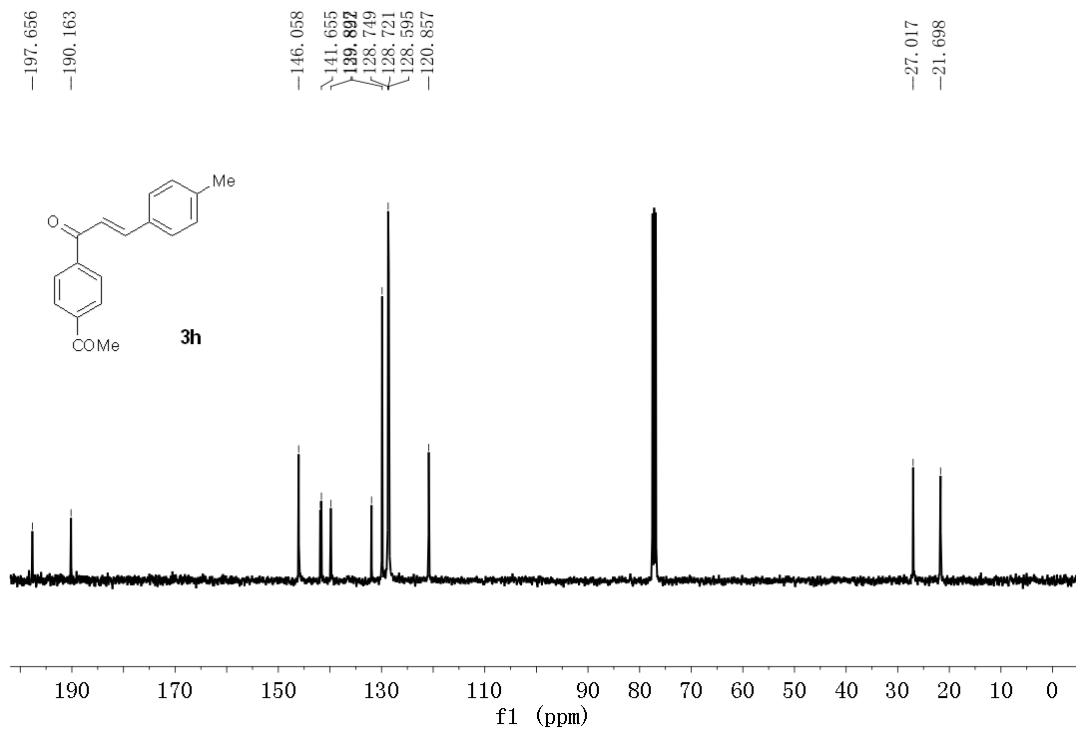

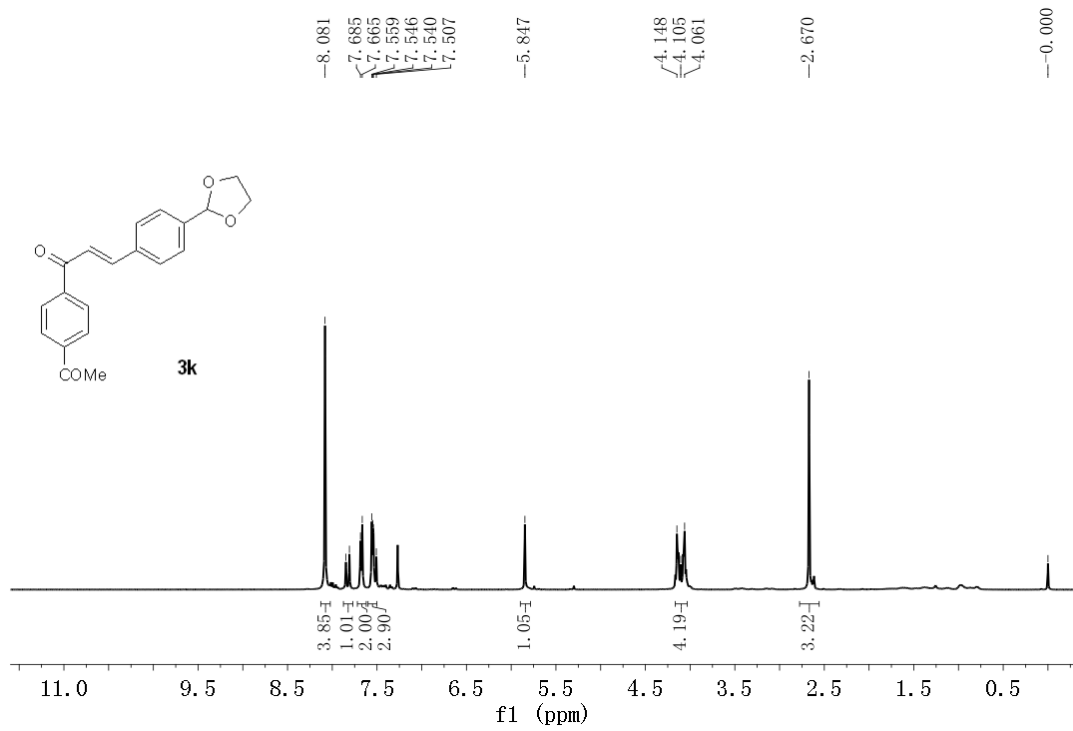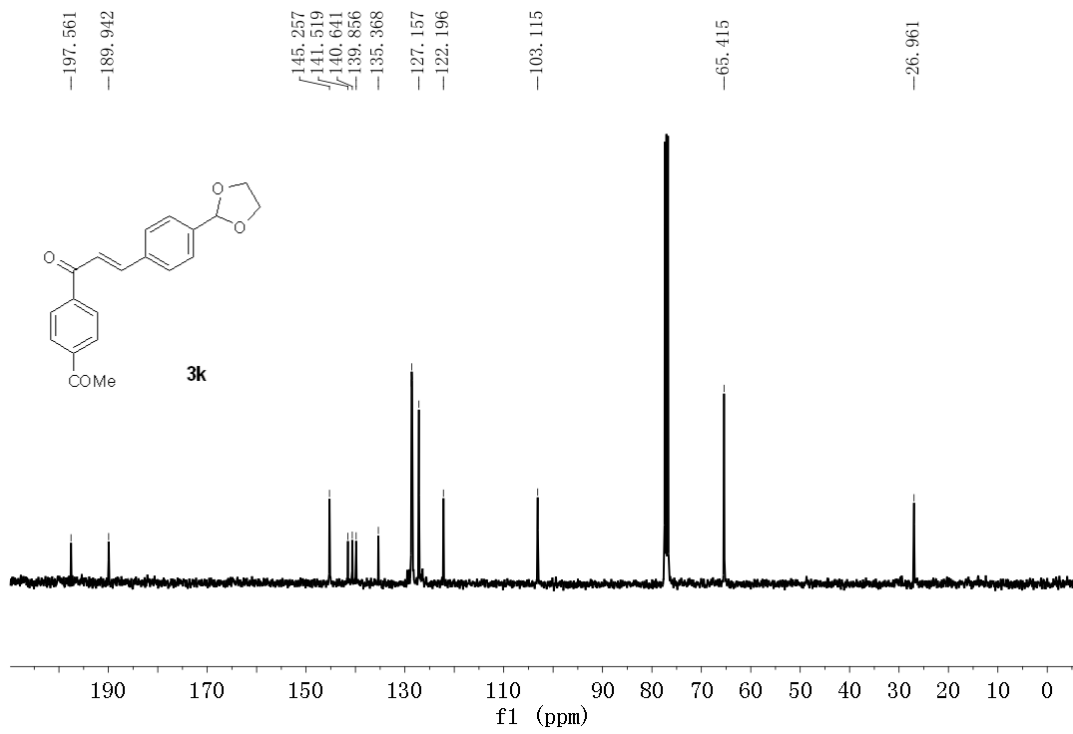

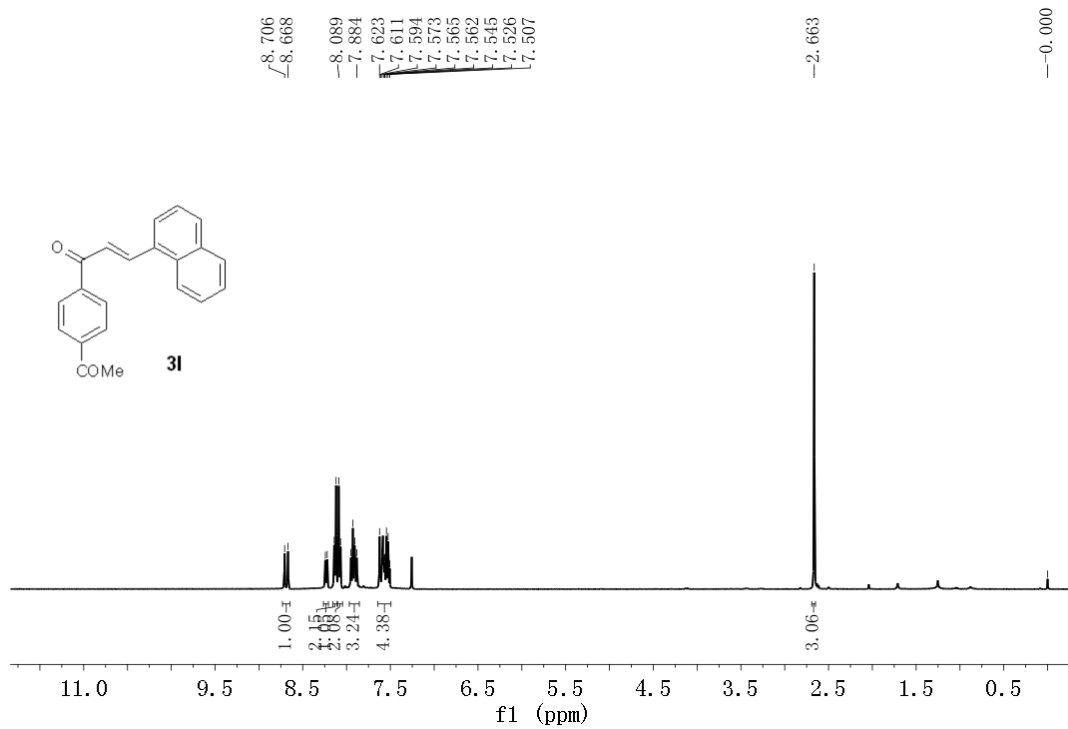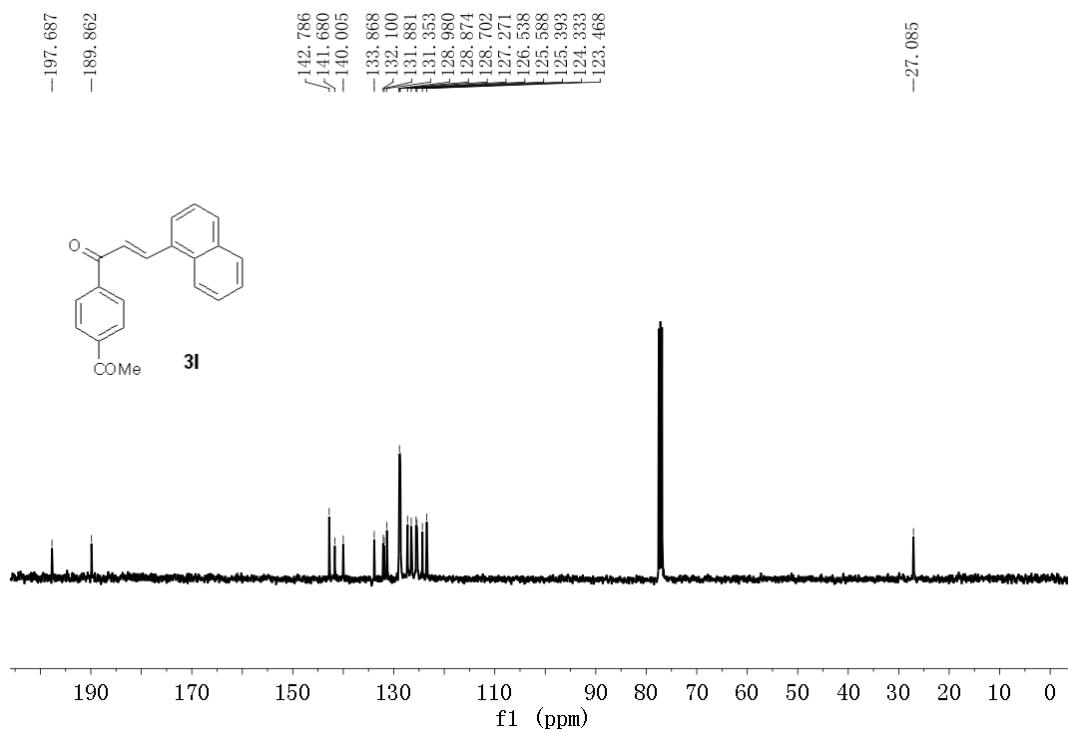

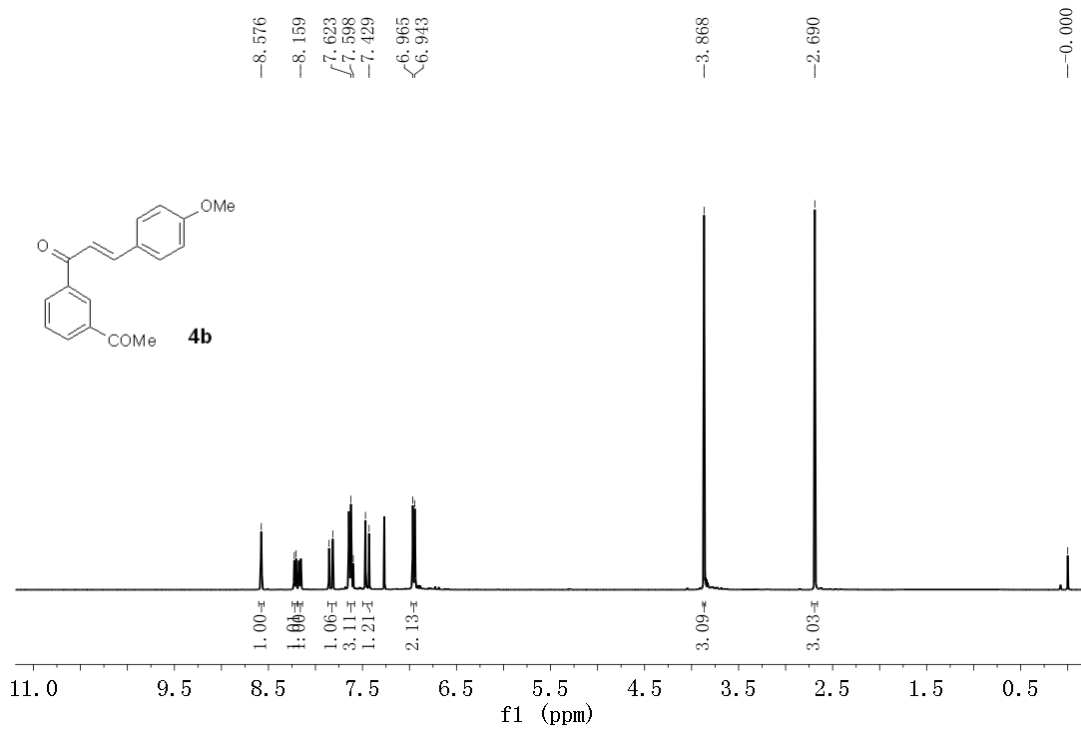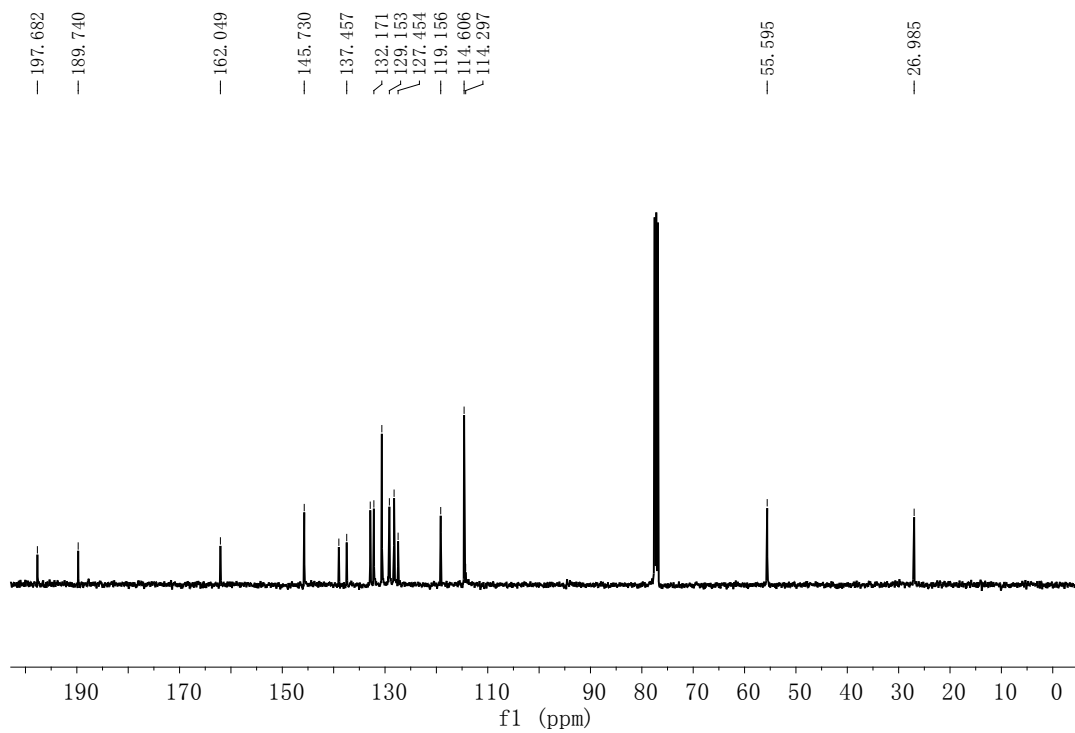

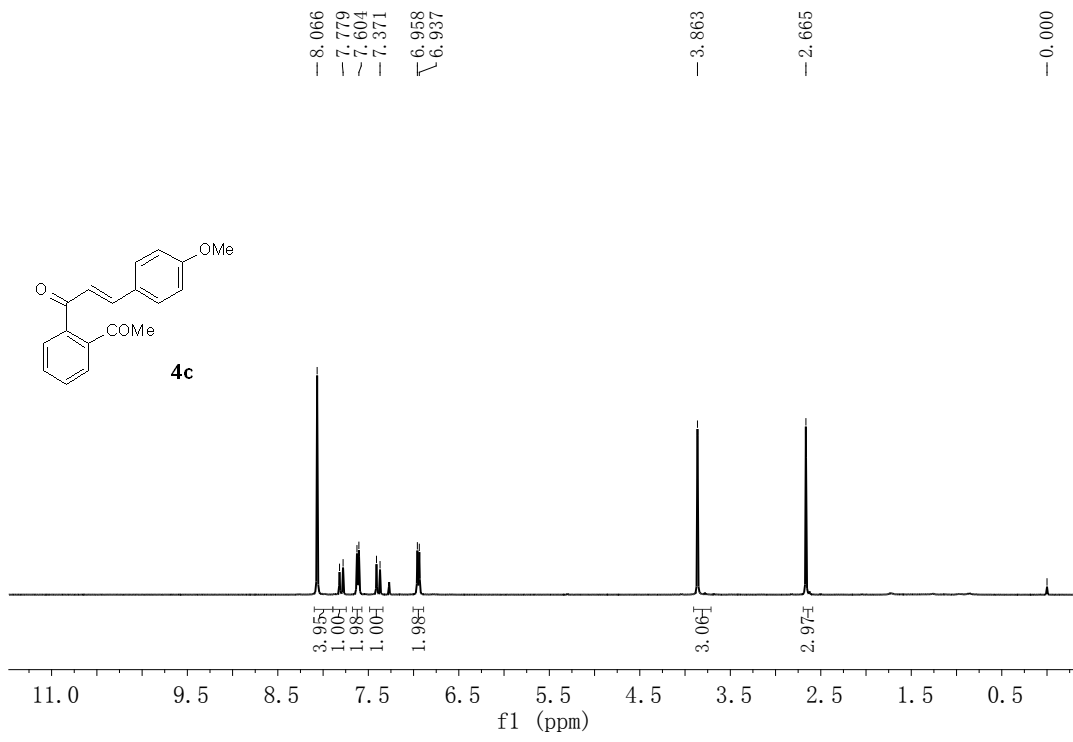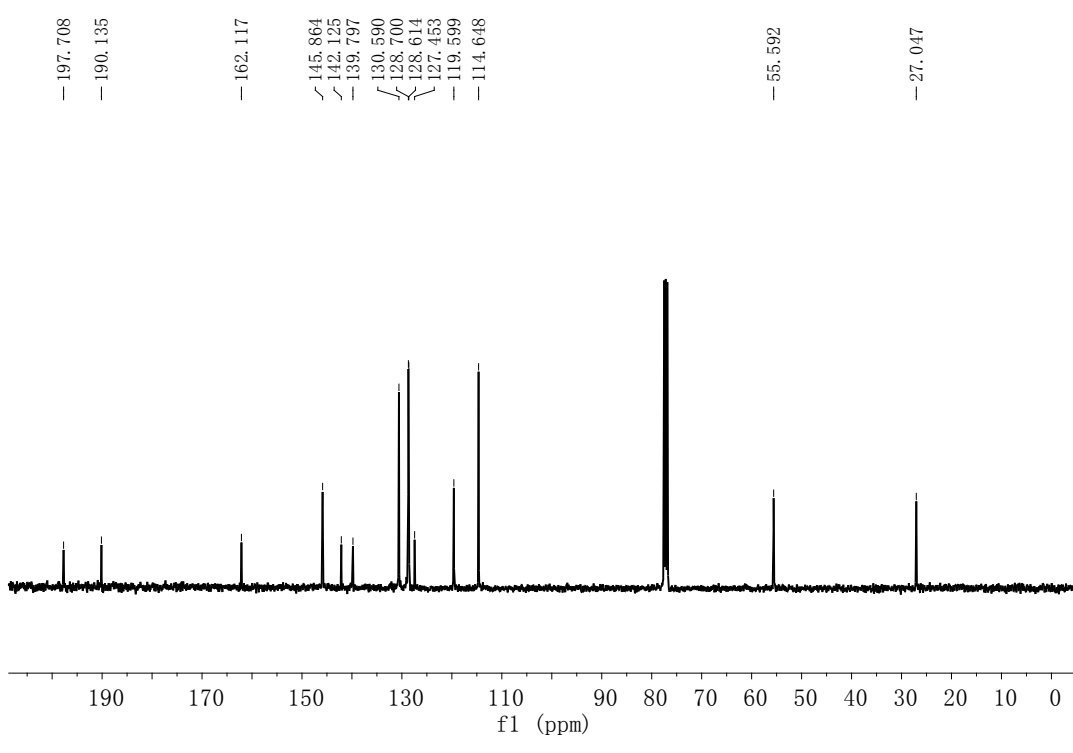



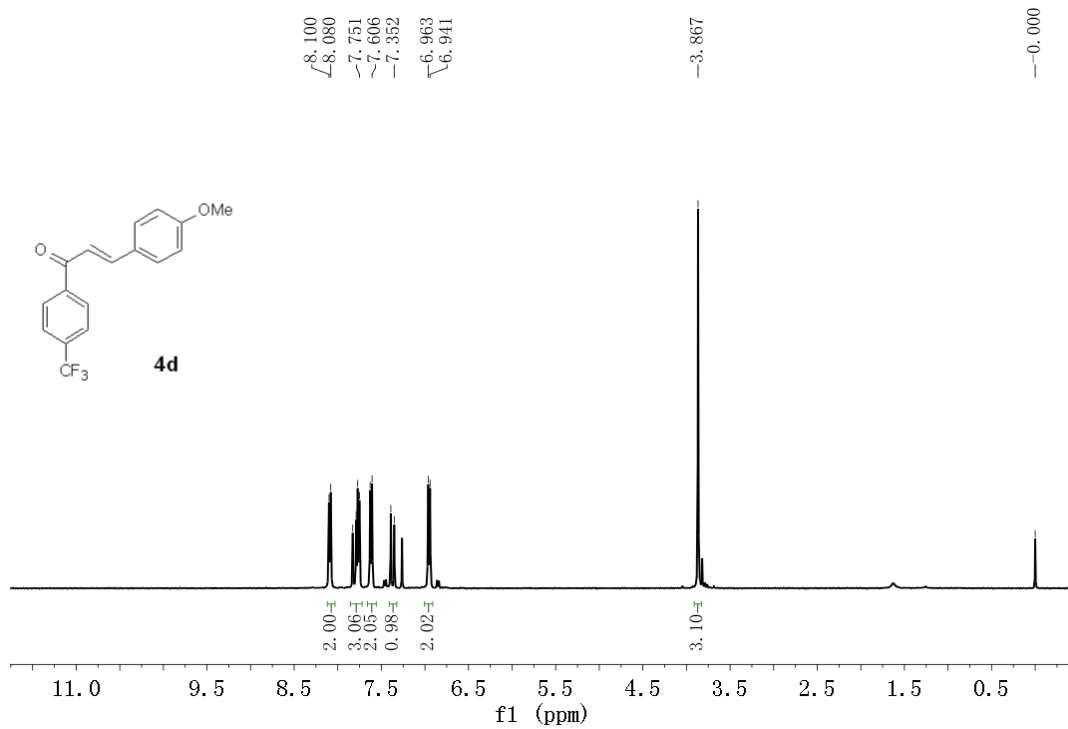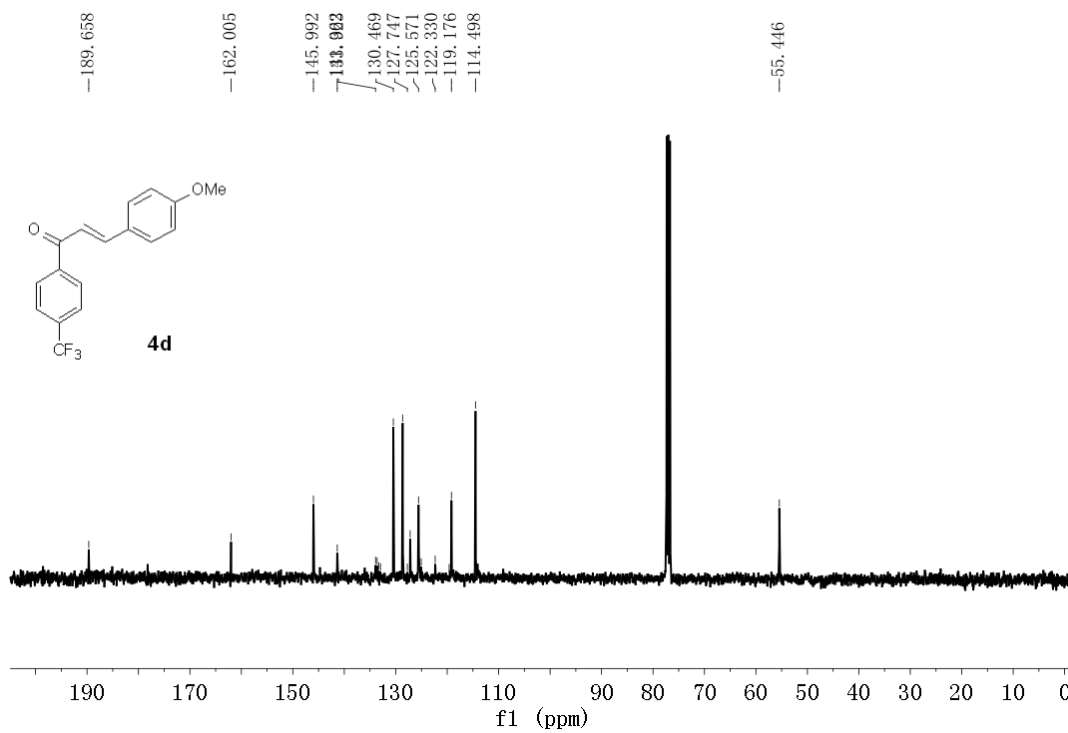

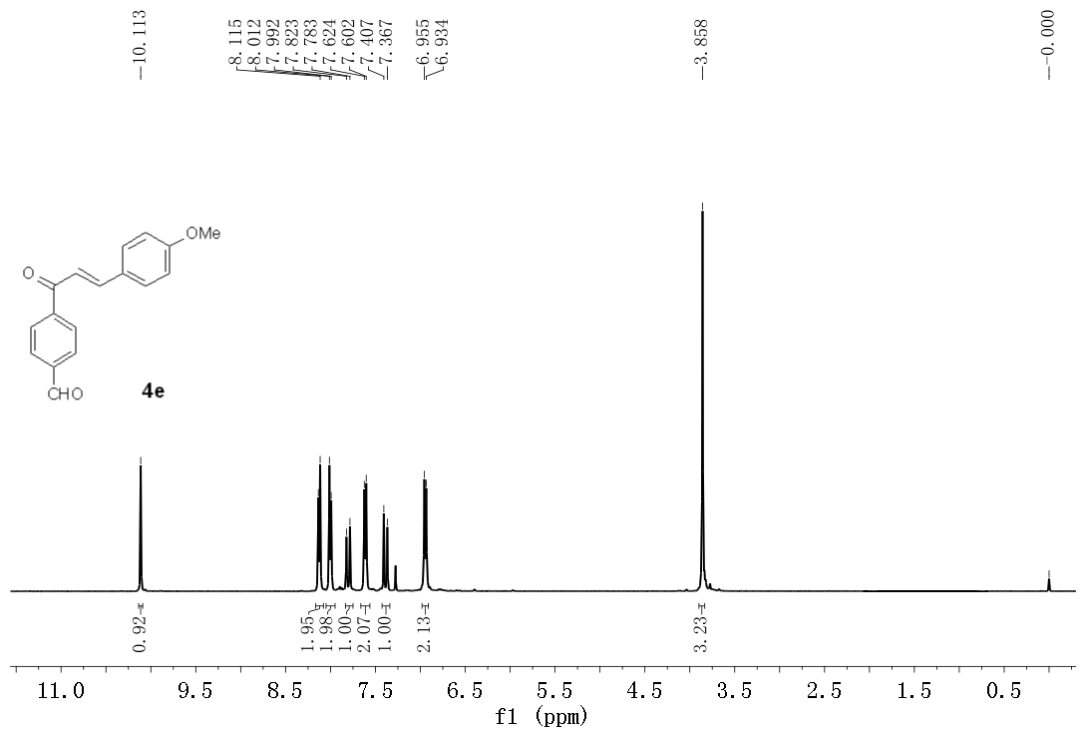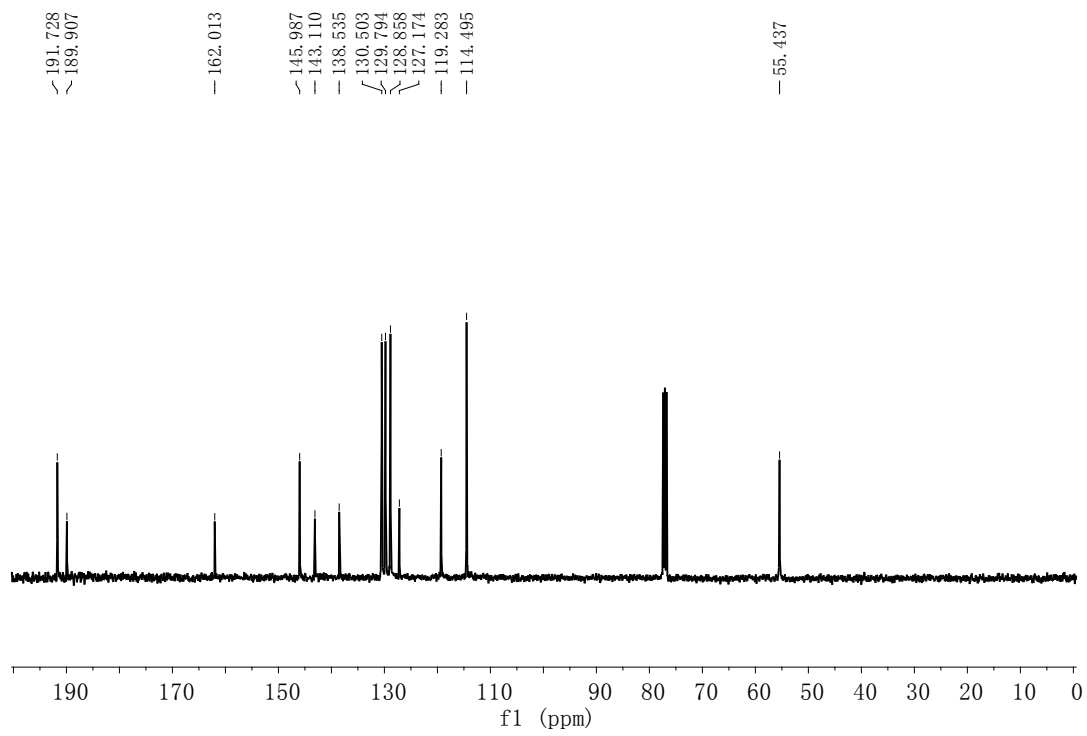

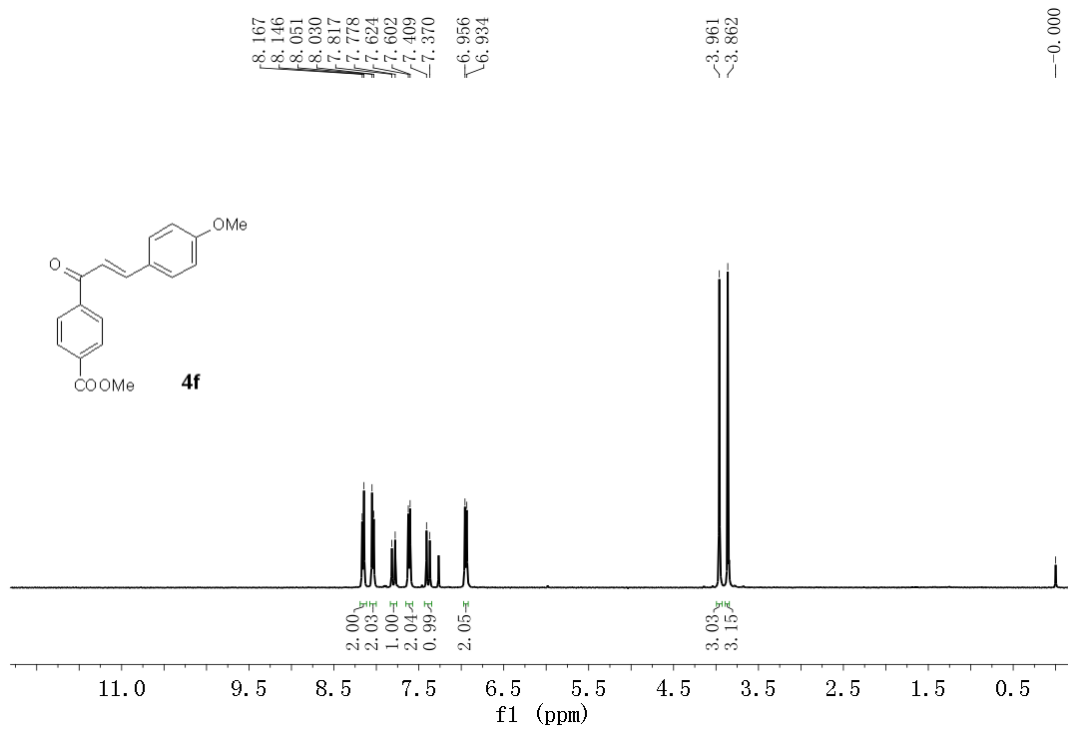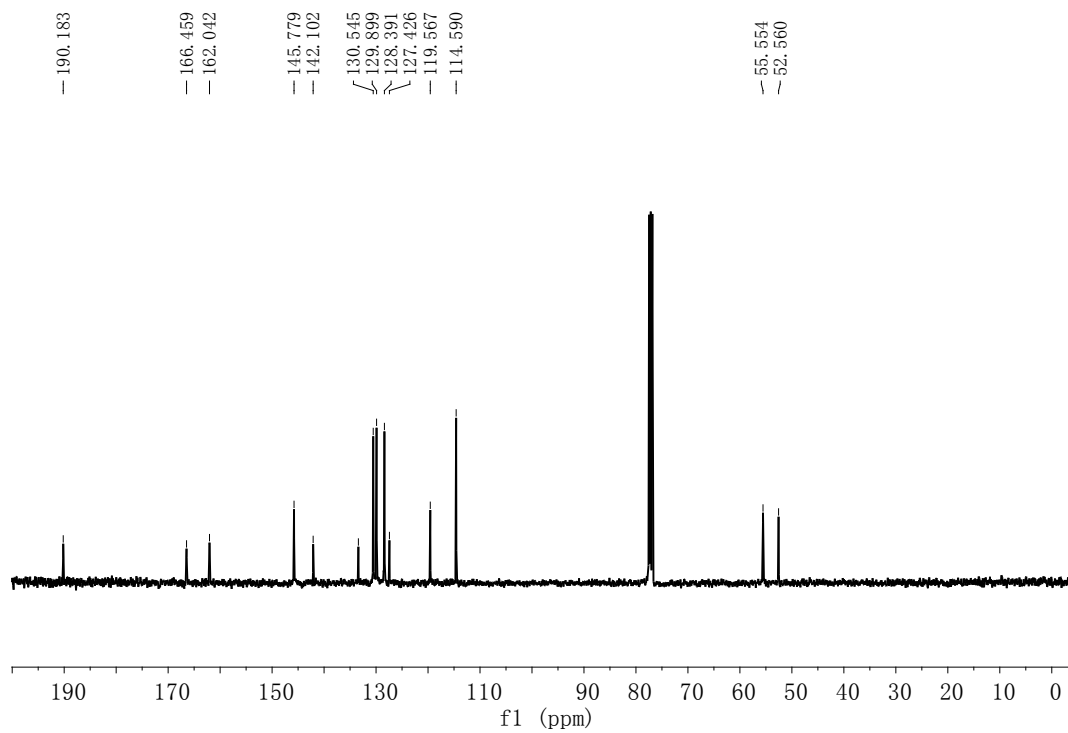

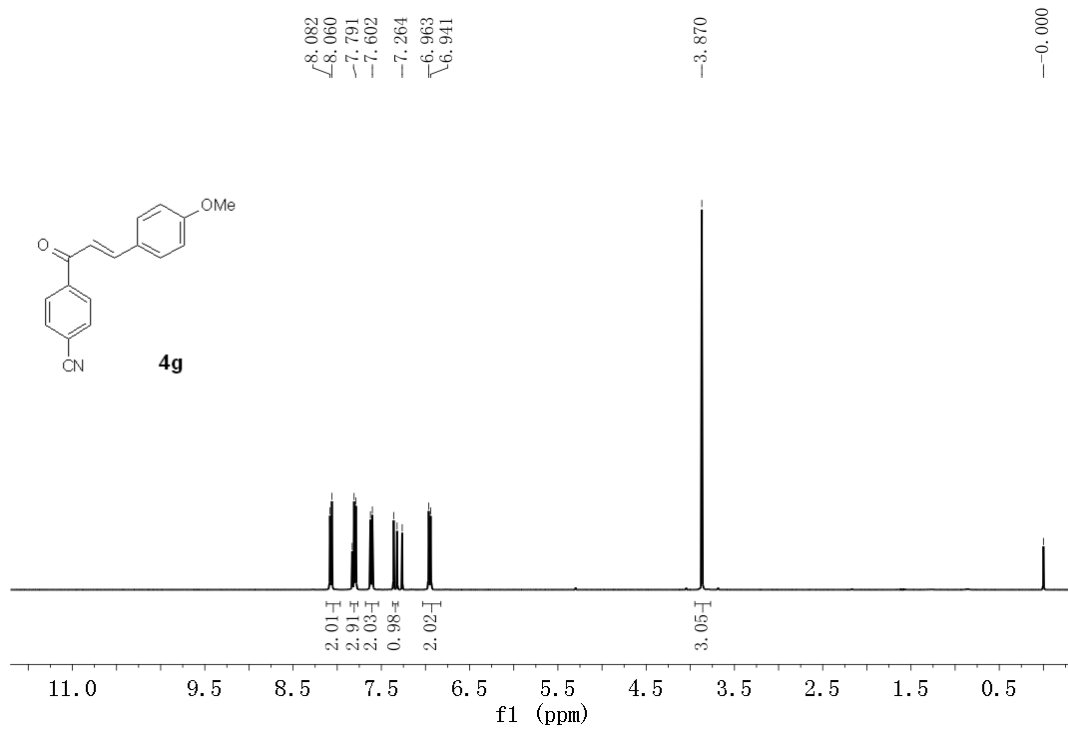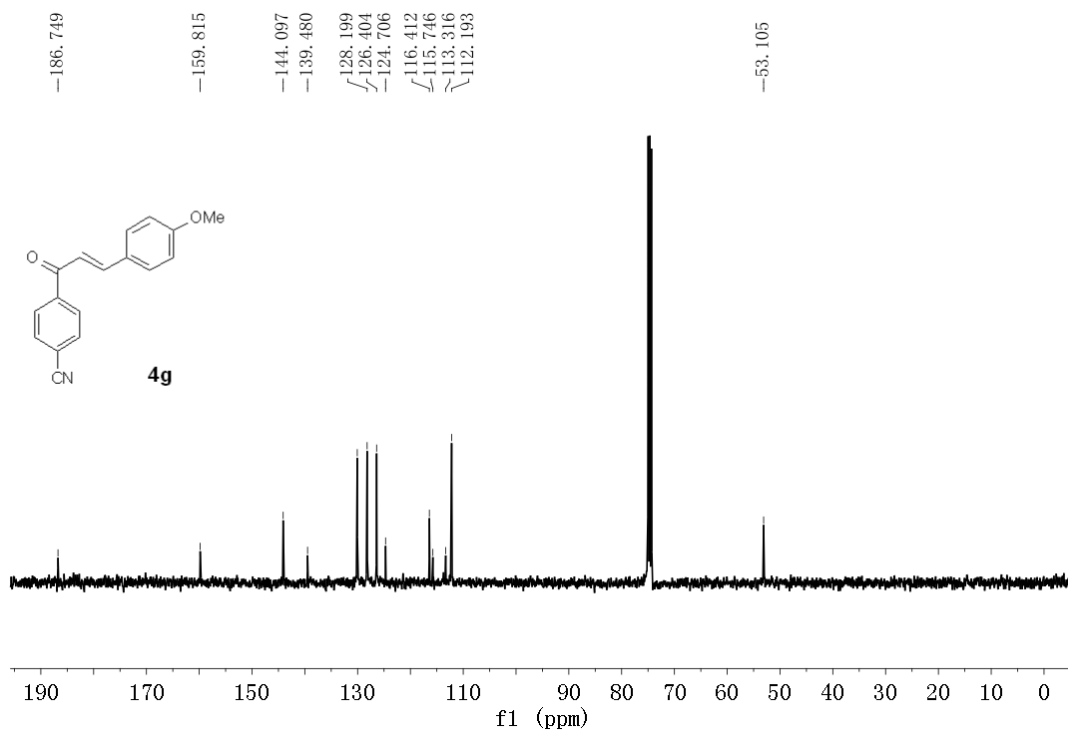

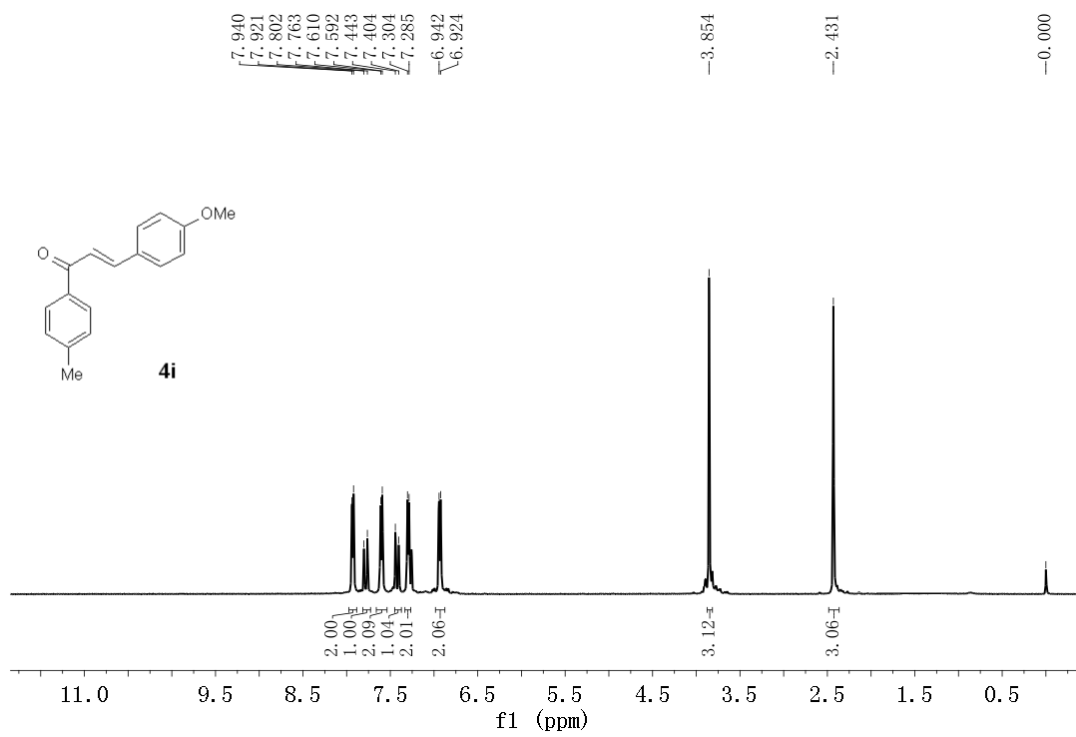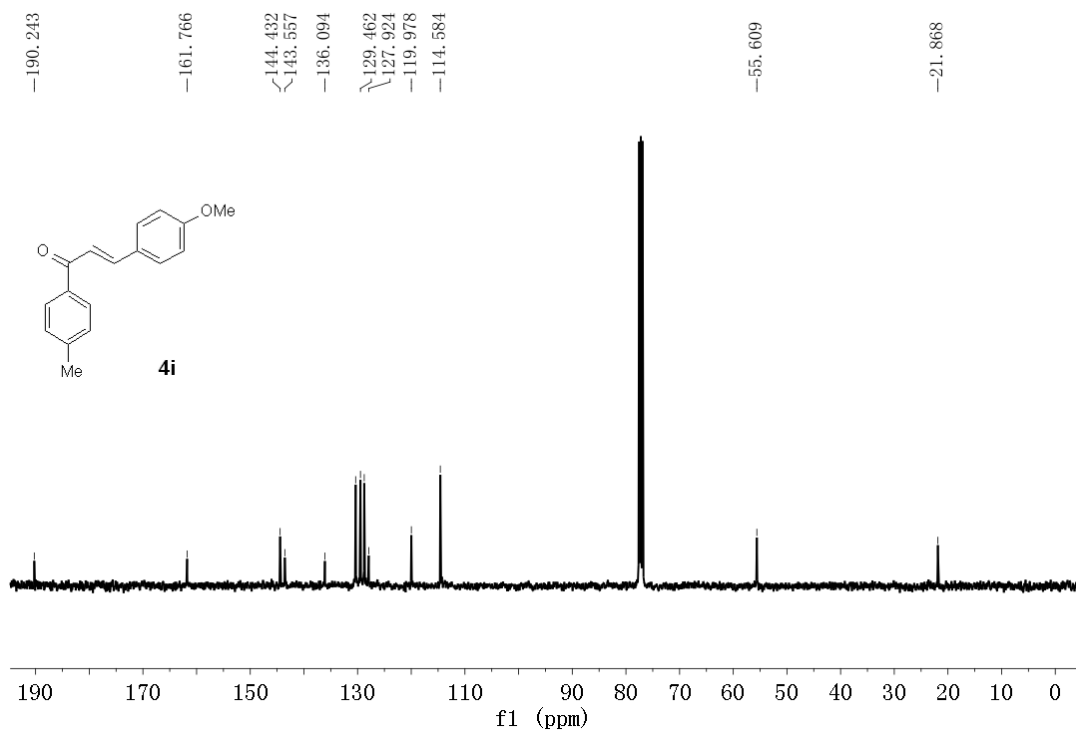

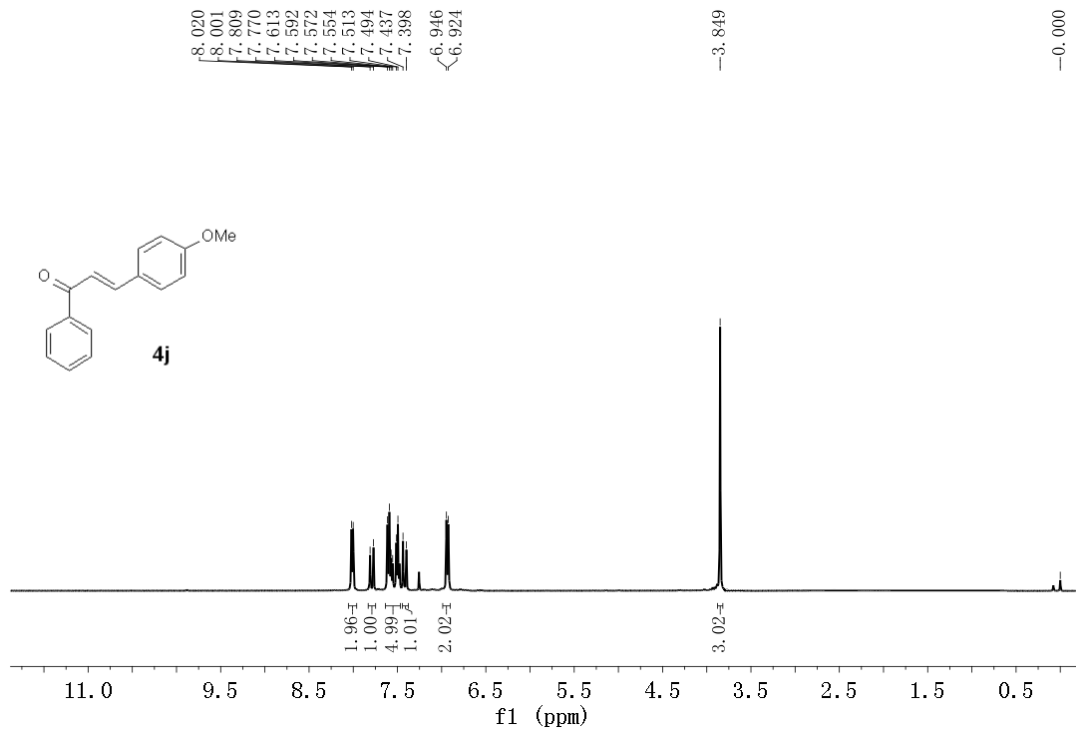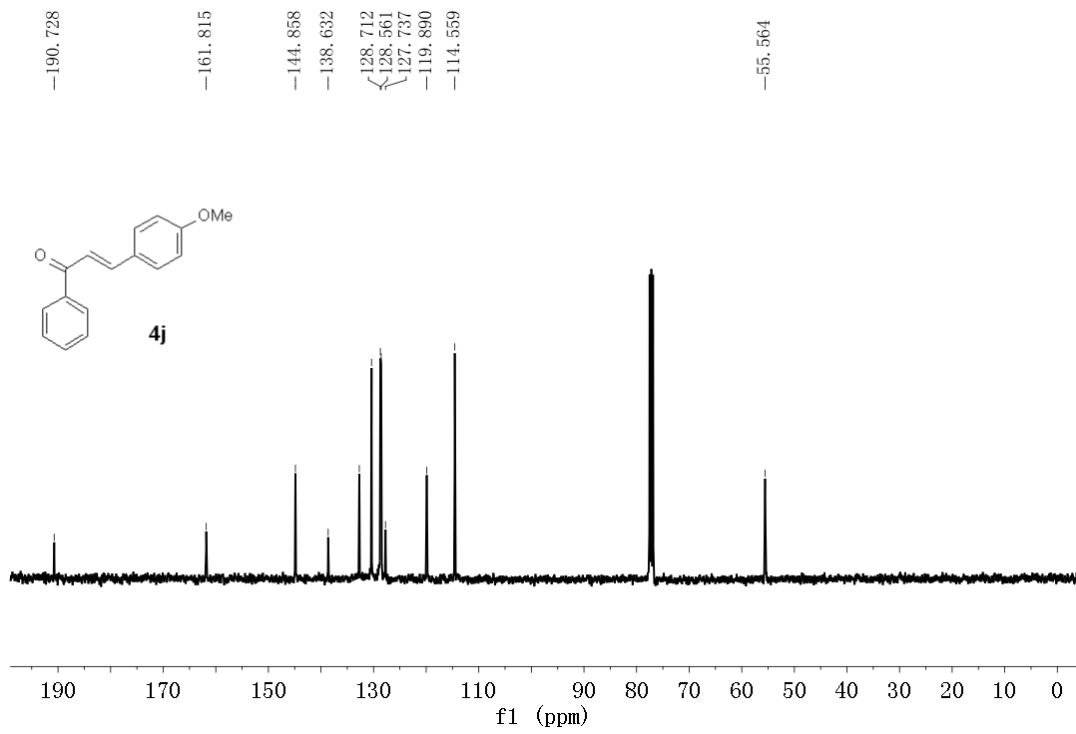

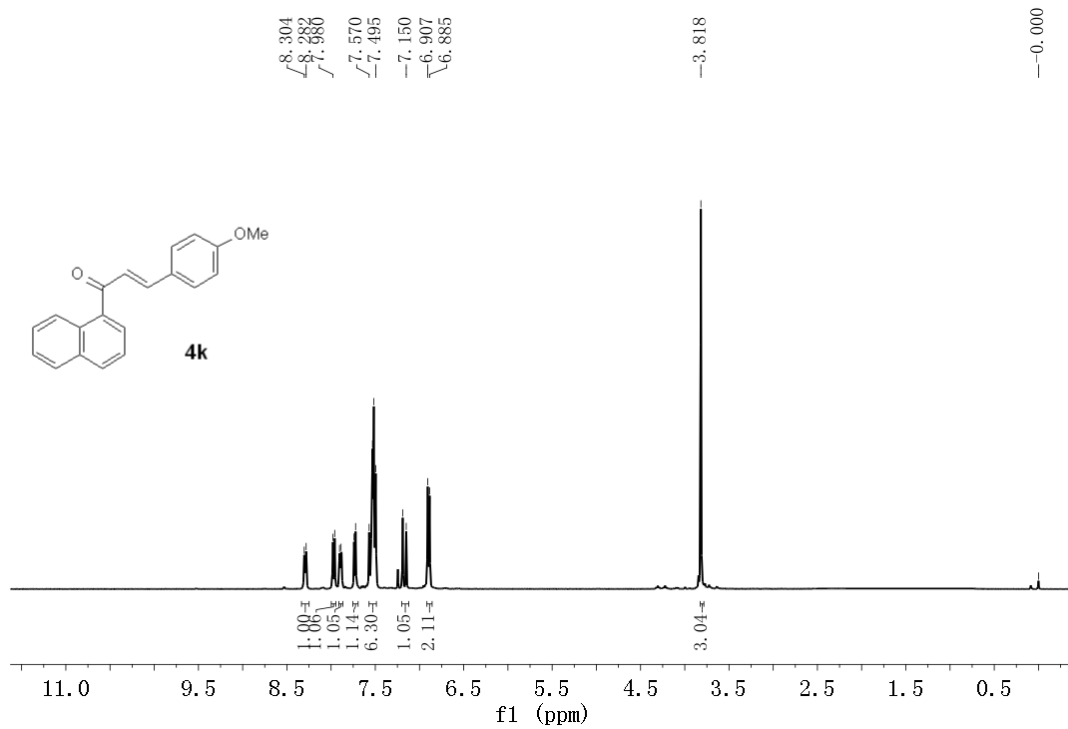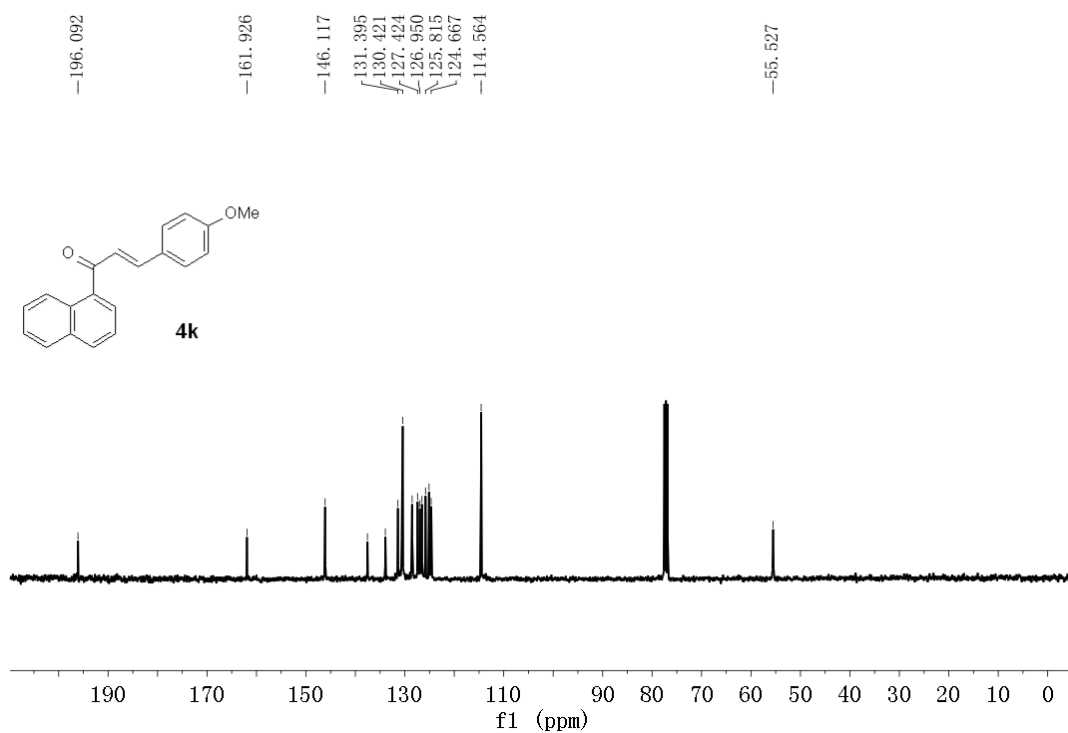

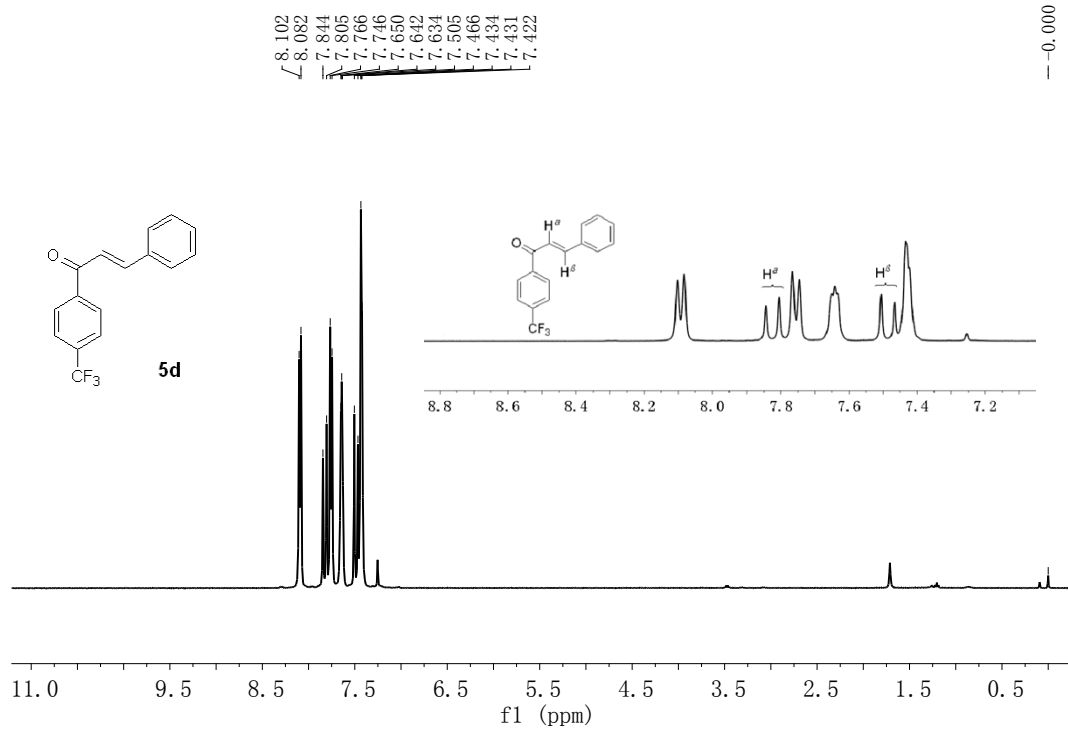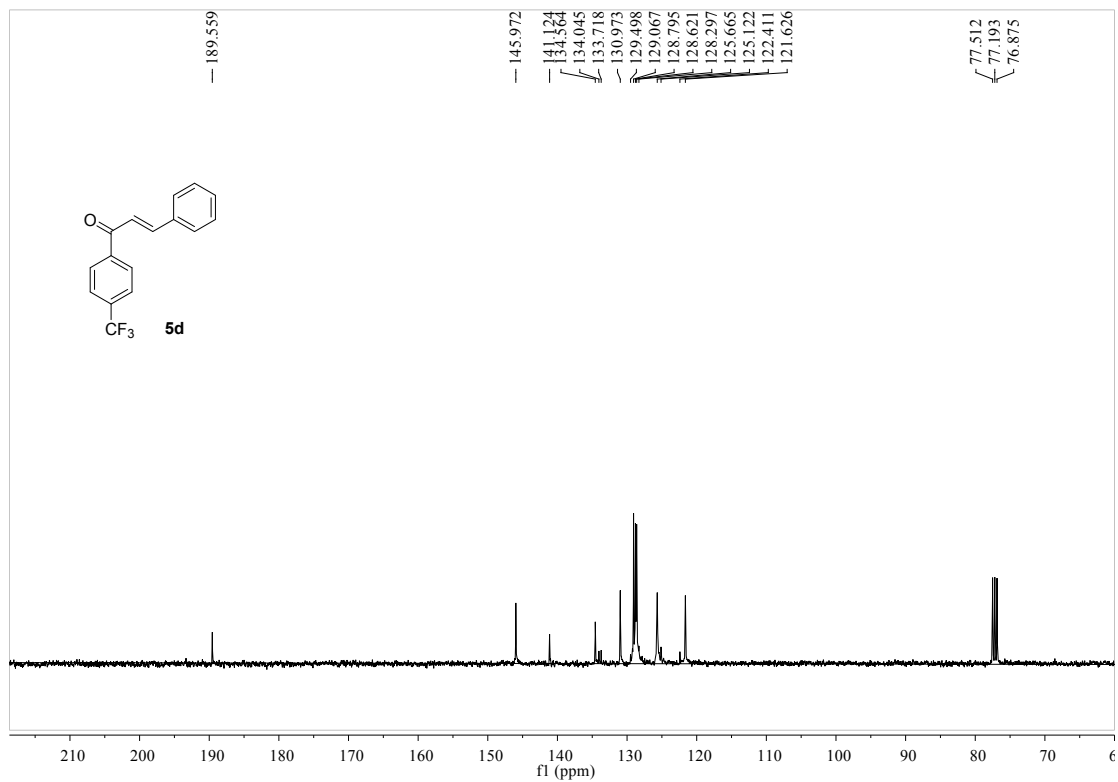



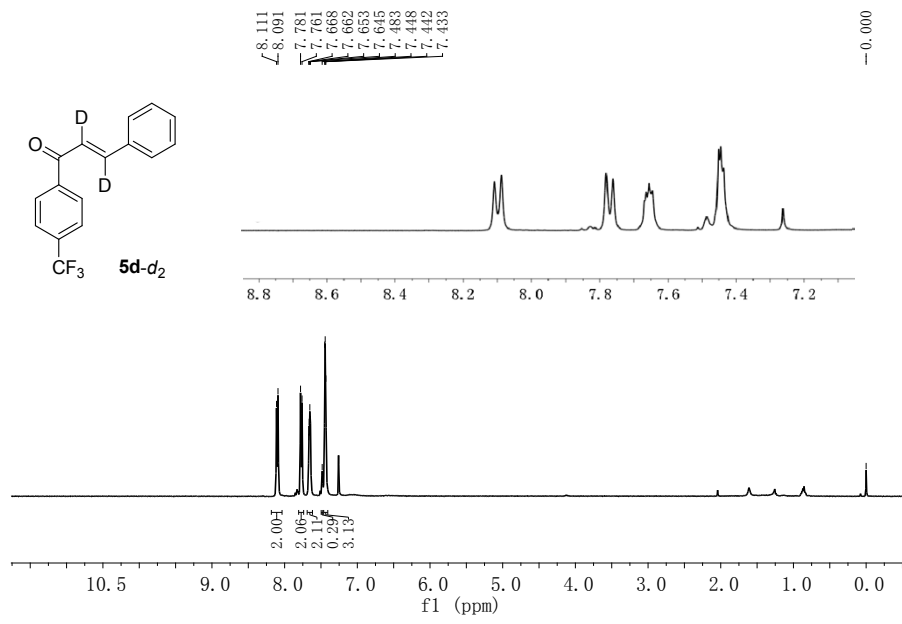

Supplement: c4ob01263a1.pdf [file c4ob01263a1.pdf]
